1 TITLE: Wood capacitance is related to water content, wood density, and anatomy across 30  
2 temperate tree species

3 AUTHORS: Kasia Ziemińska<sup>1\*</sup>, Emily Rosa<sup>2</sup>, Sean M. Gleason<sup>3</sup>, and N. Michele Holbrook<sup>4</sup>

4 <sup>1</sup>Arnold Arboretum of Harvard University, Boston, MA 02131, USA; <sup>2</sup>Sonoma State  
5 University, Rohnert Park, CA 94928, USA; <sup>3</sup>United States Department of Agriculture –  
6 Agricultural Research Service, Water Management and Systems Research Unit, Fort Collins,  
7 CO 80526, USA; <sup>4</sup>Department of Organismic and Evolutionary Biology, Harvard University,  
8 Cambridge, MA 02138, USA

9 [\\*kasia.s.zieminska@gmail.com](mailto:kasia.s.zieminska@gmail.com)

10

## 11 SUMMARY

---

12

13 Water released from wood tissue during transpiration (capacitance) can meaningfully affect  
14 daily water use and drought response. To provide context for better understanding of  
15 capacitance mechanisms, we investigated links between capacitance and wood anatomy.  
16 On twig wood of 30 temperate angiosperm tree species, we measured capacitance, water  
17 content, wood density, and anatomical traits, i.e., vessel dimensions, tissue fractions, and  
18 vessel-tissue contact fractions (fraction of vessel circumference in contact with other tissues).  
19 Across all species, the strongest predictors of capacitance were wood density (WD) and  
20 predawn lumen volumetric water content ( $VWC_{L-pd}$ ,  $r^2_{adj}=0.44$ ,  $P<0.0001$ ). Vessel-tissue  
21 contact fractions explained an additional ~10% of the variation in capacitance. Regression  
22 models were not improved by including predawn relative water content ( $RWC_{pd}$ ) or tissue  
23 lumen fractions. Among diffuse-porous species,  $VWC_{L-pd}$  and vessel-ray contact fraction  
24 were the best predictors of capacitance, whereas among ring/semi-ring-porous species,  
25  $VWC_{L-pd}$ , WD and vessel-fibre contact fraction were the best predictors. Mean  $RWC_{pd}$  was  
26  $0.65\pm 0.13$  and uncorrelated with WD.  $VWC_{L-pd}$  was weakly negatively correlated with WD.  
27 Our findings imply that capacitance depends on the amount of stored water, tissue  
28 connectivity and the bulk wood properties arising from WD (e.g., elasticity), rather than the  
29 fraction of any particular tissue.

30

31 Keywords: angiosperm trees, capacitance, fibres, parenchyma, vessels, water storage, wood  
32 anatomy, wood density

33

## 34 INTRODUCTION

---

35 Water stored in wood can buffer excessive water demand on diurnal (Goldstein *et al.* 1998;  
36 Meinzer, James & Goldstein 2004; Meinzer *et al.* 2008; Meinzer, Johnson, Lachenbruch,  
37 McCulloh & Woodruff 2009; Scholz *et al.* 2007; Köcher, Horna & Leuschner 2013;  
38 Lachenbruch & McCulloh 2014; Carrasco *et al.* 2015) and seasonal time scales (Hao,  
39 Wheeler, Holbrook & Goldstein 2013; Pratt & Jacobsen 2017; Salomón, Limousin, Ourcival,  
40 Rodríguez-Calcerrada & Steppe 2017). Estimates of the contribution of stored water to a  
41 tree's daily water budget range from 5 to 50% (Goldstein *et al.* 1998; Kobayashi & Tanaka  
42 2001; Phillips *et al.* 2003; Meinzer *et al.* 2004; Scholz *et al.* 2007; Köcher *et al.* 2013;  
43 Carrasco *et al.* 2015). Thus, water storage can be an important component of whole-plant  
44 water balance (Gleason, Blackman, Cook, Laws & Westoby 2014; Blackman *et al.* 2016;  
45 Christoffersen *et al.* 2016). However, the mechanisms of water storage and release, and  
46 their structural underpinnings remain unclear. Consequently, our understanding of cost vs.  
47 benefits of water storage and how storage is coordinated with other tree functions is limited.  
48 Here, our objective was to quantify water storage (amount of stored water) and diurnal  
49 capacitance (water released per wood volume per change in stem water potential,  $\text{kg m}^{-3}$   
50  $\text{MPa}^{-1}$ ) across a diverse suite of 30 temperate angiosperm trees.

51 Capacitance is most often measured using psychrometers and estimated as the initial  
52 slope extracted from a water release-potential curve (Meinzer, James, Goldstein & Woodruff  
53 2003; Meinzer *et al.* 2008; Scholz *et al.* 2007; McCulloh *et al.* 2012; Trifilò *et al.* 2015; Jupa,  
54 Plavcová, Gloser & Jansen 2016; Santiago *et al.* 2018; Siddiq, Zhang, Zhu & Cao 2019).  
55 However, if tissues *in natura* never become fully saturated, or if the operating water potential  
56 of xylem falls outside the initial water release curve, then this way of estimating capacitance  
57 may be functionally irrelevant. Oversaturating wood prior to measuring capacitance may also  
58 skew results. Moreover, using psychrometers on excised material is likely burdened with an  
59 artefact due to water being released from open vessel ends (Tyree & Yang 1990; Jupa *et al.*  
60 2016). Few studies have estimated diurnal capacitance across the range of water potentials  
61 experienced by field plants, with only two studies using pressure chamber measurements of  
62 non-transpiring leaves (Zhang, Meinzer, Qi, Goldstein & Cao 2013; Wolfe & Kursar 2015)  
63 and one study using psychrometers on excised tissues (Richards, Wright, Lenz & Zanne  
64 2014). We addressed this shortcoming by measuring capacitance between predawn and  
65 midday during peak summer conditions. To avoid open vessels and oversaturation artefacts,  
66 we estimated capacitance from the difference in wood water content between predawn and  
67 midday with the corresponding change in stem water potential measured using bagged, non-  
68 transpiring (equilibrated) leaves (Begg & Turner 1970; Clearwater & Meinzer 2001). We refer  
69 to this measure as 'day capacitance', following Zhang *et al.* (2013).

70 Anatomical structure should determine wood capacitance (Zimmermann 1983; Tyree  
71 & Yang 1990; Holbrook 1995). Tyree & Yang (1990) proposed that water release consists of  
72 three phases linked to anatomy: 1) an initial phase (0 to ca. -0.6 MPa), when water is  
73 released from capillary storage (already embolized fibres, vessels and tracheids, and  
74 intercellular spaces), 2) a second phase (< -0.6 MPa but prior to vessel embolization), when  
75 water is released from elastic storage (cells with elastic cell walls), and 3) a final phase  
76 (below the embolization threshold), when water is released from embolizing vessels and  
77 fibres, likely resulting in permeant damage to the xylem tissue, at least in large trees. Despite  
78 this well-developed and popular theory, few studies have quantified wood anatomy in relation  
79 to capacitance, and none of them used methods, which would avoid open vessels and  
80 oversaturation artefacts. As a result, we lack quantitative understanding of the anatomical  
81 drivers of capacitance, especially for angiosperm trees, which exhibit substantial variation in  
82 stem cell sizes, types, their proportions and geometry.

83 Given these knowledge gaps, it is surprising that parenchyma, the main living tissue  
84 in wood commonly believed to have elastic cell walls, is often assumed the primary source of  
85 capacitance in stems (e.g. Meinzer *et al.* 2003; Steppe & Lemeur 2007; Plavcová & Jansen  
86 2015; Vergeynst, Dierick, Bogaerts, Cnudde & Steppe 2015; Morris *et al.* 2016; Li *et al.*  
87 2018; Rungwattana & Hietz 2018; Santiago *et al.* 2018). Several studies have extended this  
88 idea to suggest that a higher parenchyma fraction may therefor confer higher capacitance  
89 (Borchert & Pockman 2005; Scholz, Phillips, Bucci, Meinzer & Goldstein 2011; Pratt &  
90 Jacobsen 2017; Secchi, Pagliarani & Zwieniecki 2017; Nardini, Savi, Trifilò & Lo Gullo 2018).  
91 While this may indeed be the case in highly parenchymatous stems like palms or baobabs  
92 (Holbrook & Sinclair 1992; Chapotin, Razanameharizaka & Holbrook 2006a b), it may be  
93 less likely for the majority of tree species, which tend to have lower wood parenchyma  
94 fractions (Morris *et al.* 2016). In these species, parenchyma are connected with other cells  
95 (fibres, vessels) via highly lignified middle lamella impeding parenchyma independent  
96 volumetric changes. Moreover, recent microCT studies, suggest that water released from  
97 cavitating fibres and vessels may contribute meaningfully to capacitance at moderate water  
98 potentials (Knipfer *et al.* 2017, 2019).

99 Here, we measured detailed anatomical traits, water storage and capacitance to  
100 address the following questions: 1) how large is day capacitance and how does it vary  
101 among diverse temperate tree species?, 2) how much water is stored in wood and does this  
102 water volume limit day capacitance during peak summer?, 3) which anatomical traits are  
103 related to capacitance?

104

105 MATERIALS AND METHODS

106 **Site, species and individuals**

---

107 All measurements were taken from trees growing at the Arnold Arboretum of Harvard  
108 University in Boston (Massachusetts, USA). Mean annual temperature in 2017, the year  
109 when capacitance measurements were taken, was 10.9°C and annual precipitation was 787  
110 mm. Growing season (March to October) mean temperature was 15.3°C and precipitation  
111 was 562 mm. Mean temperature during sampling (August) was 21.2°C and precipitation was  
112 22 mm. The soil texture is variable across the Arboretum and sampled trees grew on: sandy  
113 loam, slit loam, loamy sand, and an outcrop complex. The studied trees were excluded from  
114 the Arboretum's supplemental watering regime during the summer 2017.

115 Thirty species of deciduous, angiosperm trees were selected, spanning 30 genera  
116 and 26 families (Table 1; tree accession numbers are listed in Table S1). InsideWood  
117 database (InsideWood 2004; Wheeler 2011) was used as a guide to select species with the  
118 most diverse anatomies, e.g., parenchyma abundance, porosity (diffuse-, ring- or semi-ring-  
119 porous) and vessel size.

120 Due to the limited number of individuals per species, trees were sampled across the  
121 existing variation in topography and soil texture. Trees growing near streams and ponds  
122 were avoided and only healthy trees were sampled. When possible, similar height trees per  
123 given species were studied. We measured branches exposed to the midday sun. However,  
124 variation in forest density near the measured trees contributed to variation in the amount of  
125 sun branches received throughout the course of a day and across measurements and  
126 species.

127

### 128 **Capacitance and water storage: sampling and measurements**

129 Water storage and capacitance measurements were performed during the second half of  
130 August 2017. Ten individuals per day were sampled, resulting in a total of nine sampling  
131 days. In the case of rain, sampling was delayed for one or two days. For stem water  
132 potential, four leaves per tree were enclosed in opaque, silver, 4 mil (0.1 mm) thick Mylar zip-  
133 lock bags the evening before sampling. In principle, the water potential of a bagged, non-  
134 transpiring leaf will come into equilibrium with the stem water potential. As such, bagged leaf  
135 water potential (i.e., after equilibration) provides an estimate of stem water potential (Begg &  
136 Turner 1970; Clearwater & Meinzer 2001). Two leaves at predawn and two leaves at midday  
137 were collected. The bagged leaf was cut with a razor blade and the bag was immediately  
138 closed and placed in an insulated box at ambient temperature. Six terminal, 0.5-0.7 m long  
139 twigs per tree, four of which also included the leaves bagged the previous evening, were  
140 sampled. Three of these twigs (per tree) were collected at predawn and three twigs at  
141 midday. Twigs for each predawn-midday pair were located near each other, as close as tree  
142 architecture allowed (usually within 0.5 m) to limit the variation in water content that might be  
143 expected along the length of a branch. After collecting the predawn twig, the cut surface on

144 the branch still attached to a tree was covered with Vaseline to reduce drying from the  
145 exposed surface. Twigs were quickly de-leafed (apical meristem was removed together with  
146 most distal leaves), double-bagged in zip-lock bags, and placed in an additional opaque bag  
147 at ambient temperature. Each sampling event took approximately two hours. After collecting  
148 all leaves and twigs, material was transported to the onsite laboratory within 5 min.

149 Immediately after arrival to the laboratory, leaf water potential was measured on one  
150 leaf per tree using a pressure chamber (Model 1000, PMS Instrument Company, USA). Next,  
151 twig segments ca. 60 mm long and 5 mm diameter (excluding bark and pith) were cut at a  
152 minimum 50 mm distance from the initial, field cut. The segments were quickly wrapped in  
153 Parafilm, placed in a 4 mil zip-lock bag, and then into a cooled box with ice. After preparing  
154 all samples, the following steps were carried out in a humidity-controlled room (at relative  
155 humidity of 75-80%) to minimize water loss. Bark and pith were removed, the ends were  
156 trimmed by a few mm, and fresh mass was measured on an analytical balance (Sartorius,  
157 0.00001g), after which the samples were placed in distilled water.

158 These wood samples were then stored at 4°C for two weeks and, afterwards,  
159 saturated mass and volume was measured using Archimedes principle as described in  
160 (Ziemińska, Westoby & Wright 2015). In several cases, twigs did not sink even after two  
161 weeks of soaking, thus indicating that gas was still present in those samples. These samples  
162 were held under water at ca. 60°C for several hours. This treatment resulted, in all cases, in  
163 samples that sank, and, next, volume and saturated mass was recorded. For logistic  
164 reasons, we were unable to measure volume within 48 hours after sampling, as is commonly  
165 done in other studies. However, our preliminary tests confirmed that across all species  
166 studied, volume measured on fresh vs. saturated samples (after two weeks of soaking at  
167 4°C) differed on average by 2% ± 1.1% SD, and as such, should not meaningfully influence  
168 our volume estimates. As comparison, soaking for 48 hours resulted in 1.6% ± 0.9% SD  
169 volume change – similar to the change after two weeks. After saturated mass and volume  
170 measurements, the samples were dried at 102°C for three days and dry mass was recorded.

171 Broadly, water storage is defined here as the amount of water contained in a wood  
172 sample. It can be expressed as: relative water content or volumetric water content. Relative  
173 water content (RWC) is the proportion of water in a sample relative to the maximum amount  
174 of water that could be stored in that sample and was calculated as follows:

175 
$$\text{RWC} = \frac{M_F - M_D}{M_S - M_D}$$

176 where  $M_F$  is sample fresh mass,  $M_D$  is sample dry mass, and  $M_S$  is sample saturated mass.  
177 Volumetric water content (VWC) indicates total water volume per sample volume (Gartner,  
178 Moore & Gardiner 2004) and was calculated as follows:

179 
$$\text{VWC} = \frac{(M_F - M_D)}{V \times \rho}$$

180 where  $V$  is sample volume and  $\rho$  is water density, assumed to equal  $1 \text{ g cm}^{-3}$ . We also  
181 partitioned VWC to lumen ( $\text{VWC}_L$ ) and wall ( $\text{VWC}_W$ ) water content. For that, we assumed  
182 that the fibre saturated point (FSP), defined as the point where only water bound in cell wall  
183 is present, is at 30% moisture content (MC) (Ross 2010; Dlouhá, Alméras, Beauchêne, Clair  
184 & Fournier 2018). The standard equation for moisture content is:

$$185 \quad \text{MC} = \frac{(M_F - M_D)}{M_D} \times 100\%$$

186 (Ross 2010). From this equation, we calculated sample mass at FSP ( $M_{\text{FSP}}$ ) and estimated  
187  $\text{VWC}_L$  as:

$$188 \quad \text{VWC}_L = \frac{(M_F - M_{\text{FSP}})}{V \times \rho}$$

189 and  $\text{VWC}_W$  as:

$$190 \quad \text{VWC}_W = \frac{(M_{\text{FSP}} - M_D)}{V \times \rho}$$

191 Next, we estimated lumen relative water content ( $\text{RWC}_L$ , Longuetaud *et al.* 2016):

$$192 \quad \text{RWC}_L = \frac{M_F - M_{\text{FSP}}}{M_S - M_{\text{FSP}}}$$

193 All water content indices were estimated at predawn and midday, indicated by subscripts ( $_{\text{pd}}$   
194 and  $_{\text{md}}$ ).

195 Following a simplified version of the equation from Meinzer *et al.* (2003) and Richards  
196 *et al.* (2014), cumulative water released (CWR,  $\text{kg m}^{-3}$ ) was calculated, separately for  
197 predawn and midday, as follows:

$$198 \quad \text{CWR} = \frac{M_S - M_F}{V}$$

199 and then multiplied by 1000 to convert units from  $\text{g cm}^{-3}$  to  $\text{kg m}^{-3}$ . Wood day capacitance ( $\text{kg}$   
200  $\text{m}^{-3} \text{MPa}^{-1}$ ) was estimated as:

$$201 \quad \text{Capacitance} = \frac{\text{CWR}_{\text{md}} - \text{CWR}_{\text{pd}}}{\Psi_{\text{pd}} - \Psi_{\text{md}}}$$

202 where  $\Psi$  is stem water potential. This calculation of capacitance takes saturation as a  
203 reference point, to minimize the effect of intrinsic differences between predawn and midday  
204 samples (e.g., in their wood density). However, capacitance could also be estimated more  
205 directly from fresh and dry samples only:

$$206 \quad \text{Capacitance}_{\text{F-D}} = \frac{\left(\frac{M_F - M_D}{V}\right)_{\text{pd}} - \left(\frac{M_F - M_D}{V}\right)_{\text{md}}}{\Psi_{\text{pd}} - \Psi_{\text{md}}}$$

207  
208 In principle, if predawn and midday water content was measured on exactly the same  
209 samples, the two measures of capacitance would lead to exactly same results. However, this  
210 was not the case in our study, because predawn and midday water content was assessed on

211 separate samples. Nevertheless, the two measures were well correlated with each other  
212 ( $r^2=0.76$ ,  $P<0.001$ ) and the intercept and slope were not significantly different from 0 and 1,  
213 respectively ( $P=0.80$  and  $P=0.59$ ; Fig. S1 in supporting information; *Paulownia tomentosa*  
214 was excluded because, as an extreme outlier (see Results), it would have a  
215 disproportionately strong effect on this analysis). This strong correlation suggests that  
216 findings based on 'capacitance' as presented in the current study would be very similar to  
217 findings based on 'capacitance<sub>F-D</sub>'.

218 All measured traits, their abbreviations used in the text and units are listed in Table 2.

219

## 220 **Anatomy: sampling and measurements**

221 For anatomical measurements, one, midday sun-exposed twig per tree was collected in  
222 August 2016. Twigs were transported to the lab in semi-opaque, plastic bags. Next, several  
223 pieces with wood diameter of 4-6mm (excluding bark and pith) were cut and stored in 70%  
224 ethanol for about three months until further processing. In about a third of cases, samples  
225 collected in 2016 and 2017 came from different individuals (Table S1) due to either  
226 deteriorated foliage health state between the two years or considerable storm damage. Twig  
227 size (diameter and length) and location on the tree (e.g., aspect) were consistent between  
228 2016 and 2017 sampling, although in some cases slightly lower branches were measured in  
229 2017 to allow for leaf bagging.

230 Cross-sections ~10-20  $\mu\text{m}$  thick were made using Reichert sledge microtome, blade  
231 holder (Accu-Edge M7321-43) and low-profile blades (Accu-Edge, 4689). To facilitate  
232 flattening, sections were stored between two glass slides held together by paper clips in 50%  
233 ethanol for several days. Next, sections were stained in a mixture of safranin O and Alcian  
234 Blue (0.35g safranin O in 35ml 50% ethanol + 0.65g of Alcian Blue in 65ml of distilled water)  
235 for three minutes, and then rinsed and mounted on a glass slide in glycerol. Longitudinal  
236 radial and tangential sections of one sample per species were also taken to assist in  
237 anatomical interpretations. A pie-shaped region of one cross-section per tree (three trees per  
238 species) was photographed using a Zeiss Axiophot microscope, AxioCam 512 camera and  
239 Zen Blue 2.3 software (ZEISS, Germany). Magnification was provided by a Plan-Neofluar  
240 20x objective. Several photos were taken to cover the entire pie region, stretching from pith  
241 to cambium, which then were stitched together in freeware Image Composite Editor  
242 (Microsoft, 2015).

243 Anatomical measurements were done on three individuals per species (Table S1),  
244 across all growth rings ( $4.4 \pm 1.5$  SD) with the exception of vessel-tissue contact fractions  
245 (see below), which were measured on all except the innermost ring due to the substantial  
246 time/labour cost of this measurement. The potential error resulting from this approach is  
247 likely minimal because tissue fractions measured on all growth rings exhibited a strong



248 correlation with tissue fractions measured on all except innermost ring ( $r^2 > 0.90$  for most  
249 tissues,  $r^2 = 0.79$  for fibre fraction and  $r^2 = 0.76$  for living fibre fraction), and the innermost ring  
250 usually contributes little to the whole-twig cross-section.

251 Lumen and wall were measured separately for all tissue fractions: fibre, living fibre,  
252 axial parenchyma, ray parenchyma, vessels, and conduits with maximum diameter  $< 15 \mu\text{m}$   
253 (for these, lumen and wall were counted together). The latter category (denoted hereafter  
254 conduits<sub>15</sub>) likely encompassed small vessels, the tapered ends of vessels (tails), and  
255 tracheids. Living fibres were identified by the presence of starch, nuclei or septa, and their  
256 wall thickness was similar to fibres and/or thicker than parenchyma walls. From these  
257 measurements, we calculated the fraction of lumen per given tissue. The vessel  
258 characteristics measured included: vessel mean area and diameter (mean of minimum and  
259 maximum diameters of a given vessel), hydraulically weighed diameter ( $D_H = \Sigma \text{diameter}^5 /$   
260  $\Sigma \text{diameter}^4$ ; Sperry, Nichols, Sullivan & Eastlack 1994), vessel number per cross-sectional  
261 area, and the vessel size-to-number ratio (denoted S in Zanne *et al.* 2010), calculated as  
262 mean vessel area divided by vessel number per cross-sectional area). We also measured  
263 the proportion of vessel circumference in contact with other tissues, referred to collectively as  
264 'vessel-tissue contact fraction'. For example, 'vessel-axial parenchyma contact fraction' is the  
265 proportion of vessel circumference in contact with axial parenchyma.

266 For vessel traits, we first colored vessels in black using the "magic wand" tool in  
267 freeware GIMP (GNU Image Manipulation Program, [www.gimp.org](http://www.gimp.org)) excluding protoxylem  
268 vessels. Next, vessels and the total pie-shaped sample area were automatically measured in  
269 freeware ImageJ (ImageJ; Schneider, Rasband & Eliceiri 2012). Image manipulation and  
270 analysis were processed using Wacom Cintiq 22HD pen display (Wacom Technology  
271 Corporation, Portland, USA).

272 For tissue fractions, a grid method was applied (Ziemińska *et al.* 2015). Briefly, each  
273 grid point overlaid over the pie region in ImageJ was classified ('Cell counter' plugin,  
274 [https://imagej.net/Cell\\_Counter](https://imagej.net/Cell_Counter)) depending on which tissue it fell into (Fig. 1 in Ziemińska *et al.*  
275 *et al.* 2015). The distance between grid points was  $55 \mu\text{m}$ . On average, we analysed 484  
276 ( $\pm 128$ ) points per pie region and the total number of points depended on the wood sample  
277 and the pie region sizes. For ray wall fraction we counted only walls perpendicular to the  
278 cross-section, and as such our measurements are likely underestimates. For vessel-tissue  
279 contact fractions, all vessels in a pie region were analysed except for the innermost growth  
280 ring (see above). For this measurement, we modified the grid method. In Photoshop CS4  
281 (Adobe Systems Incorporated, USA), dots were placed at equal distances to each other at  
282 70 pixels ( $22.5 \mu\text{m}$ , Fig. 1) along the vessel lumen circumference, with the exception of the  
283 first and last dot, whose distance to each other was determined by vessel circumference. We  
284 counted the last dot only if its distance from the first dot was larger than 35 pixels (half-

285 distance between all other dots). Next, using the ‘Cell counter’ plugin as for tissue fractions,  
286 we classified each dot depending on the neighbouring tissue. For instance, if the dot fell on  
287 the border with ray, it was classified as vessel-ray contact dot, and so forth. We then took the  
288 ratio of all vessel-ray contact dots to total analysed dots in a pie region, and did the same for  
289 the other tissues. This ‘dot-ratio’ is vessel-tissue contact fraction for a given, abutting tissue.  
290 On average, we analysed 943 dots ( $\pm 605$ ) per each pie region. The number of dots  
291 depended on the total vessel circumference (e.g., it was the highest for species with large  
292 vessel fraction composed of many small vessels).

293

#### 294 **Wood density**

295 Wood density (WD) was measured on the same samples as water storage and capacitance  
296 measurements, as sample dry mass divided by saturated volume ( $\text{g cm}^{-3}$ ).

297

#### 298 **Data analysis**

299 The studied species encompassed 14 diffuse-porous species, 10 ring-porous species, and 6  
300 semi-ring-porous. Anatomically, diffuse-porous species were very different from the two other  
301 groups, which in turn were very similar to each other (see Results). Consequently, we ran  
302 analyses across all species, as well as within the two porosity groups: diffuse-porous and  
303 ring/semi-ring-porous.

304 All analysis were performed in R (R Core Team 2018). We used linear multiple  
305 regression models to assess predictors of capacitance using the ‘lm’ function. The  
306 distribution of residuals was evaluated using the ‘residualPlot’ and ‘qqPlot’ functions in the  
307 “car” package (Fox & Weisberg 2011). Colinearity of predictors was assessed using the  
308 variance inflation factor (VIF, ‘vif’ function). When  $VIF > 4$ , we removed the variables from the  
309 model. *Paulownia tomentosa* was an outlier in many relationships, so we excluded it from  
310 several models and indicate that accordingly in the Results. Correlation matrices were  
311 obtained using the ‘corrplot’ function in “corrplot” package (Wei & Simko 2017), and  
312 scatterplot matrices were obtained using the base function ‘pairs’. Selected figures (e.g.,  
313 correlation matrices) were additionally edited in Illustrator (Adobe Systems Incorporated,  
314 USA).

315 We note that tissue fractions and vessel-tissue contact fractions are not independent, i.e.,  
316 two fractions taken from the same whole should be expected to vary inversely with one  
317 another. However, this expectation is weakened when more than two tissues create the  
318 whole, as is the case for our study. Nevertheless,  $r^2$  and  $P$  values calculated from plotting  
319 one fraction against another should be interpreted with caution and in the context of all other  
320 tissue fractions.

321 To assess the relationship between total lumen fraction and saturated  $VWC_L$  ( $VWC_{L-sat}$ ), we  
322 fitted major axis models and tested for differences in slope and elevation using the 'ma'  
323 function in the "smatr" package (Warton, Duursma, Falster & Taskinen 2011).

## 324 RESULTS

### 325 Anatomical variation

---

326 Anatomical variation in tissue fractions, vessel properties and vessel-tissue contact fractions  
327 was considerable (Table S2, Fig.2a). Fibres represented the highest fraction ( $0.45 \pm 0.08$ ,  
328 here and thereafter we report mean  $\pm$  one standard deviation), followed by axial+ray  
329 parenchyma ( $0.28 \pm 0.08$ ), and then vessels ( $0.24 \pm 0.11$ ). Average axial+ray parenchyma  
330 fraction was higher than that found by global analysis of ~400 temperate species ( $0.21 \pm 7.9$ )  
331 and ranged from 0.16 to 0.43, spanning more than half of the reported in that global analysis  
332 (Morris *et al.* 2016). Vessel fraction encompassed almost the entire spectrum of global  
333 variation (Zanne *et al.* 2010). Conduits<sub>15</sub> were the least abundant ( $0.016 \pm 0.023$ , absent in *P.*  
334 *tomentosa*). Living fibres were observed in eight species, but comprised only a small fraction  
335 of total wood area ( $0.026 \pm 0.037$ ) with *Acer saccharum* as an outlier (0.11). Axial and ray  
336 parenchyma had similar fractions (axial:  $0.13 \pm 0.09$ , ray:  $0.15 \pm 0.04$ ). The fraction of tissue  
337 lumen per total area of a given tissue, called here 'lumen fraction<sub>tissue</sub>' (Table 2) varied  
338 considerably across tissue types, with vessels exhibiting the largest lumen fraction<sub>vessel</sub> ( $0.82$   
339  $\pm 0.04$ ), followed by rays ( $0.64 \pm 0.05$ ), axial parenchyma ( $0.52 \pm 0.10$ ), and then fibres ( $0.30$   
340  $\pm 0.15$ ). Although fibres had the lowest lumen fraction<sub>fibre</sub>, it also varied the most (8-fold)  
341 across species. As mentioned in Materials and Methods, ray lumen fractions (per entire  
342 wood cross-section as well as per ray tissue) were likely overestimated (wall was likely  
343 underestimated).

344 Vessel-tissue contact fractions differed significantly between tissues and across  
345 species, more so than tissue fractions (Table S2, Fig.2b). The largest contact fraction was  
346 between vessels and axial parenchyma ( $0.36 \pm 0.28$ ) and between vessels and fibres ( $0.27 \pm$   
347  $0.22$  SD). Vessel-vessel contact fraction was on average  $0.18 \pm 0.09$ , followed by vessel-ray  
348 contact ( $0.13 \pm 0.07$ ).

349 Anatomical characteristics differed considerably between diffuse-porous, semi-ring-  
350 porous and ring-porous species (Fig. 3), and these differences strongly influenced the  
351 investigated trait-trait relationships. Semi-ring-porous and ring-porous species tended to  
352 group with each other and many of these species occur in both forms (InsideWood 2004),  
353 hence we grouped them into one category denoted 'ring/semi-ring-porous' (Fig. 3).

354 Within diffuse-porous species, fibre fraction was inversely related to vessel fraction  
355 ( $r^2=0.68$ ,  $P<0.001$   $P<0.001$ , Fig.4a), but not to axial+ray parenchyma fraction ( $r^2=0.00$ ,  
356  $P=0.87$ , Fig. 4b). In contrast, within ring/semi-ring-porous species, fibre fraction was  
357 negatively correlated with axial+ray parenchyma fraction ( $r^2=0.50$ ,  $P<0.01$ , Fig. 4b) but not

358 with vessel fraction ( $r^2=0.14$ ,  $P=0.15$ , Fig. 4a). Across all species, vessel fraction was  
359 negatively related to axial+ray parenchyma fraction ( $r^2=0.43$ ,  $P<0.001$ , Fig. 4c) and this was  
360 driven by porosity type, i.e., diffuse-porous species tended to have higher vessel fraction  
361 and lower axial+ray parenchyma as oppose to ring/semi-ring-porous species. Axial  
362 parenchyma fraction was negatively correlated (weakly) with ray fraction, with diffuse-porous  
363 species tending towards higher ray fraction and ring/semi-ring-porous toward higher axial  
364 parenchyma fraction ( $r^2=0.15$ ,  $P<0.05$ , Fig. S2).

365 Species with more abundant axial and ray parenchyma tended to have more contact  
366 between these tissues and vessels. However, having abundant fibre or vessel fractions did  
367 not translate to higher vessel-fibre or vessel-vessel contact (Fig. S2). Vessel-fibre contact  
368 fraction was inversely correlated with vessel-axial parenchyma contact fraction ( $r^2=0.75$ ,  
369  $P<0.001$ , slope: -1.1, Fig. 5), Vessel-ray contact fraction was positively related to vessel-fibre  
370 contact fraction ( $r^2=0.34$ ,  $P<0.001$ , slope: 1.9) and negatively to vessel-axial parenchyma  
371 contact fraction ( $r^2=0.40$ ,  $P<0.001$ , slope: -2.6). The relatively steep slopes of these  
372 relationships indicated that per one unit change in vessel-ray contact fraction, the two other  
373 tissues changed by approximately two units. All these trade-offs were driven by strong  
374 differences between porosity groups (Fig. 3).

375 Vessel diameter was  $33 \pm 7 \mu\text{m}$  (mean vessel area:  $1077 \pm 531 \mu\text{m}^2$ ) and  $D_H$  was  $61$   
376  $\pm 25 \mu\text{m}$  averaged across all species. Vessel properties differed markedly between diffuse-  
377 porous and ring/semi-ring-porous species (Fig. 3). Mean vessel area was negatively  
378 correlated with vessel number per  $\text{mm}^2$  (i.e., species with small vessels had many of them,  
379  $\log_{10} r^2=0.84$ ,  $P<0.001$ , Fig. S2). Species with smaller vessels, measured as mean vessel  
380 area or  $D_H$ , also tended to have higher total vessel lumen fraction ( $\log_{10}$  mean vessel area:  
381  $r^2=0.49$ ,  $P<0.001$ ,  $\log_{10} D_H$ :  $r^2=0.51$ ,  $P<0.001$ , Fig. S2). Vessel size was positively correlated  
382 with axial parenchyma fraction ( $\log_{10}$  mean vessel area:  $r^2=0.33$ ,  $P<0.001$ ,  $\log_{10} D_H$ :  
383  $r^2=0.56$ ,  $P<0.001$ ), and negatively (albeit weakly) with ray fraction (mean vessel area:  
384  $r^2=0.25$ ,  $P<0.01$ ,  $D_H$ :  $r^2=0.10$ ,  $P<0.10$ ). All of these relationships were strongly affected by  
385 porosity, with diffuse-porous species at the small vessel area end of spectrum and ring/semi-  
386 ring-porous species at the large vessel area end.

387

### 388 **Anatomy and wood density**

389 Total lumen and total wall fraction were the strongest drivers of WD (negative with lumen:  
390  $r^2=0.66$ ,  $P<0.001$ , positive with wall:  $r^2=0.60$ ,  $P<0.001$ , Fig. S2). Among the specific tissues,  
391 fibre lumen and fibre wall fractions were strongest drivers of WD (negative with fibre lumen:  
392  $r^2=0.48$ ,  $P<0.001$ , positive with fibre wall:  $r^2=0.36$ ,  $P<0.001$ ). While axial+ray parenchyma  
393 fraction was positively correlated with WD (all species:  $r^2=0.17$ ,  $P<0.05$ , excluding *P.*  
394 *tomentosa*:  $r^2=0.44$ ,  $P<0.001$ ). Vessel lumen fraction was negatively correlated with density

395 (all species:  $r^2=0.13$ ,  $P<0.1$ , excluding *P. tomentosa*:  $r^2=0.23$ ,  $P<0.01$ ), Mean vessel area  
396 and  $D_H$  were not related to WD across all species (mean vessel area:  $r^2=0.003$ ,  $P=0.77$ ,  $D_H$ :  
397  $r^2=0.06$ ,  $P=0.19$ ).

398

### 399 **Water storage**

400 Relative water content (RWC) was  $0.65 \pm 0.13$  at predawn and  $0.59 \pm 0.12$  at midday.  
401 Lumen relative water content ( $RWC_L$ ) was  $0.52 \pm 0.17$  at predawn and  $0.45 \pm 0.16$  at midday  
402 (Fig. 6). Lumen volumetric water content ( $VWC_L$ ) was on average  $0.25 \pm 0.09$  at predawn,  
403  $0.21 \pm 0.08$  at midday and  $0.47 \pm 0.09$  at saturation (Table S2). The relationship between  
404  $VWC_{L-sat}$  and total lumen fraction was strong, as expected ( $r^2=0.63$ ,  $P<0.001$ , Fig. S3). The  
405 slope of that relationship was not significantly different from 1 (major axis fit,  $P=0.53$ ) and the  
406 intercept was not significantly different from 0 ( $P=0.29$ ) suggesting that the two  
407 measurements are directly related to each other. Wall VWC ( $VWC_W$ ) averaged  $0.16 \pm 0.03$   
408 and was positively correlated with total wall fraction ( $r^2=0.62$ ,  $P<0.001$ ).

409 Predawn water content was strongly associated with midday water content for all  
410 water content indices ( $r^2>0.97$ ,  $P<0.001$ ). Therefore, the following relationships are reported  
411 for predawn values only unless stated otherwise.  $VWC_{L-pd}$  was positively correlated with  
412  $RWC_{L-pd}$  ( $r^2=0.70$ ,  $P<0.001$ ) and  $RWC_{pd}$  ( $r^2=0.49$ ,  $P<0.001$ ).  $RWC_{pd}$  and  $RWC_{L-pd}$  were  
413 strongly correlated with each other ( $r^2=0.91$ ,  $P<0.001$ ), and, we use  $RWC_{L-pd}$  in subsequent  
414 analyses.

415 Relationships between anatomical traits and water content differed depending on  
416 water content indices and porosity type. Across all species, vessel lumen fraction was  
417 positively correlated with  $VWC_L$  (all species:  $r^2=0.19$ ,  $P<0.05$ , excluding *P. tomentosa*:  
418  $r^2=0.39$ ,  $P<0.001$ , Fig. 7a). Other tissue lumen fractions were weakly or not correlated with  
419  $VWC_{L-pd}$  (Fig. S2).  $VWC_{L-pd}$  tended to be higher in species with smaller vessels (log10 mean  
420 vessel area: all species:  $r^2=0.20$ ,  $P<0.05$ , excluding *P. tomentosa*,  $r^2=0.44$ ,  $P<0.001$ ; log10  
421  $D_H$ : all species:  $r^2=0.32$ ,  $P<0.01$ , excluding *P. tomentosa*,  $r^2=0.48$ ,  $P<0.001$ ). These were the  
422 strongest pairwise relationships.  $VWC_{L-pd}$  was negatively correlated with WD ( $r^2=0.19$ ,  
423  $P<0.05$ , Fig. S1) across all species. Within the two porosity groups, tissue lumen fractions or  
424 WD were not correlated with  $VWC_{L-pd}$  (Fig.S2).

425 Relationships between  $RWC_{L-pd}$  and tissue fractions were stronger than for  $VWC_{L-pd}$ ,  
426 and with different tissues. Across all species, the ones with higher fibre lumen fraction tended  
427 to have lower  $RWC_{L-pd}$  (all spp:  $r^2=0.19$ ,  $P<0.05$ , excluding *P. tomentosa*:  $r^2=0.37$ ,  $P<0.001$ ,  
428 Fig. 7b), while other tissue lumen fractions were weakly or not related (Fig. S2). Within  
429 porosity type, fibre lumen was also the strongest, inverse correlate of  $RWC_{L-pd}$  (diffuse-  
430 porous:  $r^2=0.65$ ,  $P<0.001$ , all ring/semi-ring-porous:  $r^2=0.07$ ,  $P>0.1$ , excluding *P. tomentosa*:  
431  $r^2=0.58$ ,  $P<0.01$ ). Higher  $RWC_{L-pd}$  was associated with higher ray lumen fraction in diffuse-

432 porous ( $r^2=0.33$ ,  $P<0.05$ ) and higher axial lumen fraction in ring/semi-ring-porous (excluding  
433 *P. tomentosa*:  $r^2=0.50$ ,  $P<0.01$ ). In neither of the porosity groups was vessel lumen fraction  
434 related to  $RWC_{L-pd}$ .

435  $RWC_{L-pd}$  was not related to WD across all species ( $r^2=0.00$ ,  $P=0.79$ ), nor within  
436 ring/semi-ring-porous species ( $r^2=0.00$ ,  $P=0.95$ ). But it was positively correlated within  
437 diffuse-porous species ( $r^2=0.45$ ,  $P=0.01$ ).

438

### 439 **Day cumulative water released**

440 The amount of water released between predawn and midday ( $\Delta CWR_{pd-md}$ ) was on average  
441  $37 \pm 14$  kg per  $m^3$  of wood, and was positively correlated with  $VWC_{L-pd}$  ( $r^2=0.31$ ,  $P<0.01$ ) and  
442 more weakly with  $RWC_{L-pd}$  ( $r^2=0.15$ ,  $P<0.05$ ).  $\Delta CWR_{pd-md}$  was also weakly negatively related  
443 to WD across all species ( $r^2=0.15$ ,  $P<0.05$ ). Tissue lumen fraction or vessel-tissue contact  
444 fractions were not related to  $\Delta CWR_{pd-md}$ , except for a weak positive correlation with vessel  
445 lumen fraction (all species:  $r^2=0.12$ ,  $P<0.1$ , excluding *P. tomentosa*:  $r^2=0.21$ ,  $P<0.05$ ) driven  
446 by porosity type.

447 Across diffuse-porous species,  $\Delta CWR_{pd-md}$  was negatively correlated with vessel size  
448 (mean vessel area:  $r^2=0.36$ ,  $P<0.05$ ,  $D_H$ ;  $r^2=0.36$ ,  $P<0.05$ ) and not correlated with tissue  
449 fractions or contact fractions (on pairwise basis). Across ring/semi-ring-porous species,  
450 higher  $\Delta CWR_{pd-md}$  was associated with higher  $VWC_{L-pd}$  ( $r^2=0.55$ ,  $P<0.01$ , excl. *P. tomentosa*:  
451  $r^2=0.39$ ,  $P<0.05$ ), and lower WD ( $r^2=0.30$ ,  $P<0.05$ ).

452

### 453 **Stem water potential**

454 Predawn stem water potential ( $\Psi_{pd}$ ) ranged from -0.21 to -0.93 MPa and midday stem water  
455 potential ( $\Psi_{md}$ ) from -0.37 to -2.1 MPa (Table S2). The largest change between predawn and  
456 midday water potential ( $\Delta\Psi_{pd-md}$ ) was 1.6 MPa and the smallest was 0.13 MPa. WD was  
457 higher in more negative  $\Psi_{md}$  ( $r^2=0.53$ ,  $P<0.001$ ) and larger  $\Delta\Psi_{pd-md}$  ( $r^2=0.51$ ,  $P<0.001$ )  
458 species, but correlated weakly with  $\Psi_{pd}$  ( $r^2=0.11$ ,  $P<0.1$ , Fig. S2).

459

### 460 **Capacitance**

461 Day capacitance was on average  $53 \pm 26$  kg  $m^{-3}$   $MPa^{-1}$ , excluding *P. tomentosa*, and ranged  
462 from 8 to 99 kg  $m^{-3}$   $MPa^{-1}$  (Table S2). The outlier, *P. tomentosa*, had a capacitance of 505 kg  
463  $m^{-3}$   $MPa^{-1}$ , and was excluded from further analysis. Across all species, those with higher  
464 capacitance tended to have lower WD ( $r^2=0.35$ ,  $P<0.001$ , Fig. 8a) and higher  $VWC_{L-pd}$   
465 ( $r^2=0.29$ ,  $P<0.01$ , Fig. 8b, Table 3). Together, WD and  $VWC_{L-pd}$  explained 44% of the  
466 variation in capacitance ( $r^2_{adj}=0.44$ ,  $P<0.001$ ), meaning that for a given WD, species with  
467 higher  $VWC_{L-pd}$  tended to have higher capacitance and for a given  $VWC_{L-pd}$ , species with  
468 lower WD had higher capacitance. Adding tissue lumen fractions to that model did not

469 improve its strength but adding contact fraction did (Table 3). For a given  $VWC_{L-pd}$  and WD,  
470 capacitance was higher in species with higher vessel-axial parenchyma contact fraction  
471 ( $r^2_{adj}=0.56$ ,  $P<0.001$ ), lower vessel-fibre contact fraction ( $r^2_{adj}=0.54$ ,  $P<0.001$ ) and lower  
472 vessel-ray contact fraction ( $r^2_{adj}=0.54$ ,  $P<0.001$ , Table 3). These were the strongest models  
473 describing correlates of day capacitance across all species.

474 Relationships between capacitance and other traits differed between porosity types  
475 and across all species. Among diffuse-porous species, WD or  $VWC_{L-pd}$  were not or were only  
476 marginally correlated with capacitance (Table 3). The trait combination that was most strongly  
477 related to capacitance, was  $VWC_{L-pd}$  minus vessel-ray contact fraction ( $r^2=0.52$ ,  $P<0.01$ ) and  
478 plus vessel-vessel contact fraction ( $r^2=0.41$ ,  $P<0.05$ ). In ring/semi-ring-porous species,  
479  $VWC_{L-pd}$  together with WD explained the largest proportion of capacitance variation  
480 ( $r^2_{adj}=0.59$ ,  $P<0.01$ , or after excluding *Sassafras albidum*,  $r^2_{adj}=0.73$ ,  $P<0.001$ ; *S. albidum* was  
481 the only species with the majority, if not all, fibres being gelatinous and an outlier in vessel-  
482 fibre contact fraction, Fig. 5). In addition, per given  $VWC_{L-pd}$ , species with higher vessel-fibre  
483 contact fraction also had higher capacitance ( $r^2_{adj}=0.63$ ,  $P<0.01$ ) but only after removing *S.*  
484 *albidum* (not significant, when *S. albidum* included).

485 When we substituted  $VWC_{L-pd}$  with  $RWC_{pd}$  in the models listed in Table 3, their  
486 strength was either comparable (' $RWC_{pd}$  + WD' model across diffuse-porous species),  
487 weaker by 2-7% or not statistically significant (for other models). We also ran a set of models  
488 substituting  $VWC_{L-pd}$  with WD. Across all species, no models surpassed the ones including  
489  $VWC_{L-pd}$  ( $0.28<r^2_{adj}<0.37$ ,  $P<0.01$ ). Among diffuse-porous species, none of the models were  
490 significant ( $P>0.15$ ), whereas across ring/semi-ring-porous species only WD was statistically  
491 significant.

492 Apart from the multiple regression models, species with higher capacitance tended to  
493 have less negative  $\Psi_{pd}$  ( $\log_{10}$ ,  $r^2=0.44$ ,  $P<0.001$ ) and narrower  $\Delta\Psi_{pd-md}$  ( $\log_{10}$ ,  $r^2=0.50$ ,  
494  $P<0.001$ ).

495

## 496 DISCUSSION

---

497

### 498 Day capacitance and cumulative water release

499 Across all species, WD and  $VWC_{L-pd}$  were the strongest correlates of capacitance (Table 3,  
500 Fig. 8a, b). An inverse relationship between WD and capacitance was also found in other  
501 studies, using the bagged leaf/shoot method (Wolfe & Kursar 2015; Li *et al.* 2018), as well as  
502 in studies having used psychrometers, across a wide range of water potentials (Richards *et*  
503 *al.* 2014, Meinzer *et al.* 2003, 2008; Scholz *et al.* 2007; Trifilò *et al.* 2015; Jupa *et al.* 2016;  
504 Santiago *et al.* 2018; Siddiq *et al.* 2019). Taken together, these studies offer strong evidence  
505 linking capacitance to the water content and elasticity of wood tissues.

506 The finding that higher absolute water content (here  $VWC_{L-pd}$ ) conferred higher  
507 capacitance is new, yet, it makes intuitive sense, i.e., the more water there is, the more can  
508 potentially be released. Perhaps less intuitive is the result that WD was a stronger driver of  
509 capacitance than the proportions of any individual tissues. This implies that capacitance is an  
510 emergent property of the whole-wood, rather than being linked strongly to any one  
511 anatomical component. All cells in wood are tightly packed (Fig. 1), in contrast to leaves, and  
512 joined via highly lignified lamella. Therefore, any change in cell volume, resulting from water  
513 release, would require a coordinated change across neighbouring cells (Holbrook 1995).  
514 This, presumably, would be more feasible in lower WD species that have a greater whole-  
515 organ ability to shrink (Irvine & Grace 1997). This shrinkage would result from cell volume  
516 change due to water release and/or cell wall shrinkage due to adhesive forces between  
517 water and the surfaces of the water transporting conduits (Rosner, Karlsson, Konnerth &  
518 Hansmann 2009). Indeed, daily sapwood shrinkage has been observed in several  
519 angiosperm trees (Scholz *et al.* 2008; Sevanto, Hölttä & Holbrook 2011; Lintunen, Lindfors,  
520 Nikinmaa & Hölttä 2017; Hölttä *et al.* 2018), although Scholz *et al.* (2008) found no  
521 correlation between WD and diurnal sapwood shrinkage across six species. The latter study,  
522 however, encompassed a narrow WD range ( $\sim 0.42\text{-}0.62\text{ g cm}^{-3}$ ) and when lower density  
523 tissues from bark were included, strong covariation with capacitance was observed.  
524 Enlarging the number of species and broadening the wood density range in future studies  
525 would likely help to clarify this issue.

526 Parenchyma lumen fraction, as well as all other tissue lumen fractions, either were not  
527 correlated with capacitance or were less strongly correlated than WD. Furthermore, the  
528 tissue fractions that were significant in multiple regression models were also correlated with  
529 WD (fibre lumen and axial+ray lumen parenchyma fractions, but not vessel lumen fraction,  
530 see below). This finding is in concordance with previous studies, which also found no  
531 relationship between parenchyma fraction and capacitance in four (Jupa *et al.* 2016) and  
532 nine angiosperm species (Pratt, Jacobsen, Ewers & Davis 2007). Wood parenchyma is often  
533 assumed to be a reservoir of capacitance water (Meinzer *et al.* 2003; Steppe & Lemeur  
534 2007; Plavcová & Jansen 2015; Vergeynst *et al.* 2015; Morris *et al.* 2016; Li *et al.* 2018;  
535 Rungwattana & Hietz 2018; Santiago *et al.* 2018) with some studies suggesting that more  
536 abundant parenchyma confers higher capacitance (Borchert & Pockman 2005; Scholz *et al.*  
537 2011; Pratt & Jacobsen 2017; Secchi *et al.* 2017; Nardini *et al.* 2018). Here, we show that  
538 parenchyma lumen fraction does not limit capacitance (Fig. 8c). If anything, vessel lumen  
539 fraction had the strongest, albeit still weaker than WD, link to capacitance ( $r^2=0.14$ ,  $P<0.05$ ,  
540 Fig. 8d) and  $\Delta CWR_{pd-md}$  ( $r^2=0.21$ ,  $P<0.05$ ) across all species, as well as within ring/semi-ring-  
541 porous species (multiple regression,  $r^2_{adj}=0.55$ ,  $P<0.01$ , Table 3). This result is aligned with  
542 the idea that cavitating vessels might contribute to capacitance, even at xylem water



543 potentials well above critical thresholds (Hölttä, Cochard, Nikinmaa & Mencuccini 2009;  
544 Vergeynst *et al.* 2015; Knipfer *et al.* 2019). Moreover,  $\Delta WWC_{L-pd-md}$  averaged at  $0.04 \pm 0.02$ ,  
545 which is small in comparison with tissue lumen fractions (Fig. 2, Table S2), suggesting that  
546 lumen fraction might not limit water release or that water could be released from multiple  
547 tissues. The interpretation of these results is further complicated by the possibility of variable  
548 water distribution across growth rings as well as within growth rings (Umebayashi *et al.* 2008,  
549 2010). More sophisticated methods, for example, microCT or MRI (De Schepper, van  
550 Dusschoten, Copini, Jahnke & Steppe 2012; Knipfer *et al.* 2019), would be necessary to  
551 resolve these questions.

552 Instead of tissue lumen fractions, vessel-tissue contact fractions tended to be more  
553 strongly linked to capacitance (as independent variables in multiple regression models)  
554 across all species, as well as within porosity groups. Within ring/semi-ring-porous species,  
555 per given  $WWC_{L-pd}$ , capacitance increased with higher vessel-fibre contact fraction (Table 3),  
556 suggesting that water may be released from fibres in these species (as well as vessels, see  
557 above). This is in agreement with microCT evidence of emptying fibres (and vessels) as  
558 water potential decreases (Knipfer *et al.* 2017, 2019). An interesting path forward would be to  
559 measure the size of fibre lumina and taper, because these characteristics could have an  
560 additional effect on capillary water release as capillary tension and lumen diameter are  
561 negatively correlated (Tyree & Yang 1990; Hölttä *et al.* 2009). Across diffuse-porous species,  
562 per given  $WWC_{L-pd}$ , capacitance decreased with higher vessel-ray contact fraction (Table 3).  
563 Furthermore, across all species, vessel-axial (positive), vessel-fibre (negative) and vessel-  
564 ray (negative) contact fractions were all linked to capacitance with similar strength (Table 3).  
565 Because the three contact fractions are correlated with each other (Fig. 5), it is not possible  
566 to decipher which one of these models may represent a mechanistic link. Nevertheless, the  
567 vessel-ray contact influence is consistent across all species as well as within the diffuse-  
568 porous species (Table 3). How could the inverse influence of vessel-ray contact fraction on  
569 capacitance be explained? One possibility is that, in species limited by a small volume of  
570 water released from wood (low capacitance), additional water could be supplied from bark or  
571 pith (Goldstein, Meinzer & Monasterio 1984; Cochard, Forestier & Améglio 2001;  
572 Pfautsch, Renard, Tjoelker & Salih 2015b; Pfautsch, Hölttä & Mencuccini 2015a;  
573 Mason Earles *et al.* 2016) and higher vessel-ray contact would potentially facilitate the  
574 release of this radially transported water into vessels. Partitioning capacitance between bark,  
575 wood and pith could possibly clarify the influence of contact fractions and ray parenchyma on  
576 whole-stem capacitance. We are aware of only one study (Martínez-Cabrera, Jones, Espino  
577 & Schenk 2009) that quantified contact fractions, but not in relation to any physiological trait.  
578 Our results suggest that tissue connectivity may be an important functional trait.

579

## 580 **Water storage**

581 None of the studied species was fully saturated – far from it, about half of the cell lumen  
582 was empty (average  $RWC_{L-pd}$ :  $0.52 \pm 0.17$ ). Similar values were reported in the trunk wood of  
583 three temperate angiosperms (Longuetaud *et al.* 2016, 2017). Lack of saturation may explain  
584 why our capacitance values are lower, sometimes by an order of magnitude, than  
585 capacitance estimated as the initial slope of the water release curve (on saturated samples)  
586 in several studies of tropical (Meinzer *et al.* 2003, 2008; Carrasco *et al.* 2015; Santiago *et al.*  
587 2018) and temperate species (Jupa *et al.* 2016), but in a similar range to Cerrado species  
588 (Scholz *et al.* 2007). Given that most of these studies measured capacitance on short xylem  
589 segments, it is possible that water may have been released from open conduits, thus  
590 resulting in an overestimation of capacitance (Tyree & Yang 1990; Jupa *et al.* 2016). Our  
591 values overlap more so with studies which used the bagged leaf method on tropical species  
592 (Zhang *et al.* 2013; Wolfe & Kursar 2015). Note that (Zhang *et al.* 2013) measured  
593 capacitance on entire stems, including bark and pith, which may explain the presence of  
594 species with high capacitance in that study. Our results also overlap with capacitance values  
595 of Australian angiosperms, estimated from excised material using psychrometers within the  
596 native operating shoot water potential range of these species (Richards *et al.* 2014), as well  
597 as with capacitance values estimated from the second, “flatter” phase of the water release  
598 curve (Jupa *et al.* 2016). Overall, these findings highlight the importance of *in natura* water  
599 content and capacitance measurements and the need for a better understanding of how  
600 these measurements compare with ones in which the water potentials were measured on  
601 small, excised samples.

602 WD, a direct outcome of total lumen and wall fractions, was weakly or not related to fresh  
603 water content indices, similar to other studies on three temperate angiosperms (Longuetaud  
604 *et al.* 2016, 2017) and across ca. 290, 180 and 100 species from Southeast Asia (Suzuki  
605 1999; Kenzo, Tomoaki, Yuta, Joseph Jawa & Sophal 2016; Kenzo, Sano, Yoneda & Chann  
606 2017). This lack of correlation is likely due to a considerable portion of lumen (most likely  
607 fibre lumen, Fig.7) being empty as indicated by  $RWC_{L-pd}$ . These results caution against WD  
608 being taken as a direct proxy of water content in the fresh state.

609  $VWC_L$  was more strongly correlated with capacitance than total VWC or the more  
610 commonly measured RWC, suggesting that absolute, lumen-based water indices are more  
611 relevant for capacitance than relative ones. Moreover, we estimated that the amount of wall-  
612 bound water was considerable ( $VWC_{W-pd}$  average:  $0.16 \pm 0.03$ ) in comparison with lumen  
613 water content ( $VWC_{L-pd}$  average:  $0.25 \pm 0.09$ ). Although, it needs to be noted, that these  
614 estimates may carry some error because of the assumption that fibre saturation point is  
615 attained at 30% moisture content in any species, which is not always the case (Kellogg &

616 Wangaard 1969; Dlouhá *et al.* 2018). Nevertheless, these findings highlight the need to  
617 better understand the function of lumen and wall water and their explanatory power in  
618 comparison with RWC, which conflates lumen and wall water.

619

## 620 **Anatomical landscape**

621 Differences between diffuse-porous and ring/semi-ring-porous species were startling not only  
622 in vessel properties, as has been well documented, but also in tissue fractions and vessel-  
623 tissue contact fractions. To our knowledge, this has not been reported before on a broad  
624 species set and/or with such detail (but see Fujiwara, Sameshima, Kuroda & Takamura  
625 1991; Fujiwara 1992). The anatomical patterns described here agree with ones found across  
626 six angiosperm species (Jupa *et al.* 2019). Other studies also found marked differences in  
627 wood and leaf physiology between these two porosity groups (Bush *et al.* 2008; Klein 2014;  
628 von Allmen, Sperry & Bush 2015). Although this topic is beyond the scope of this study, our  
629 anatomical results raise intriguing questions regarding structure-function relationships in  
630 diffuse-porous vs. ring/semi-ring-porous species.

631 We found that the wall fraction per total axial or ray parenchyma was relatively high  
632 and surprisingly consistent across species ( $0.48 \pm 0.10$  in axial parenchyma and  $0.36 \pm 0.05$   
633 in rays, Fig.S4). Somewhat lower values for axial parenchyma were found in ten tropical  
634 species (average: 0.29, range: 0.07 to 0.53) (Ogunwusi & Ibrahim 2017). Larger values were  
635 found for rays in 50 temperate species (range 0.25-0.65; Fujiwara 1992) and similarly for ten  
636 tropical species (0.25-0.68; Ogunwusi & Ibrahim, 2017). Parenchyma walls, especially axial  
637 parenchyma, are often considered to be thin and of insignificant contribution to the overall  
638 parenchyma proportion (e.g., Martínez-Cabrera *et al.* 2009; Zheng & Martínez-Cabrera 2013;  
639 Ziemińska, Butler, Gleason, Wright & Westoby 2013; Ziemińska *et al.* 2015; Fortunel, Ruelle,  
640 Beauchêne, Fine & Baraloto 2014), yet the results reported here and elsewhere suggest  
641 otherwise. Moreover, parenchyma wall thickness overlaps with that of thin-wall fibres  
642 (Fujiwara *et al.* 1991; Fujiwara 1992; Jupa *et al.* 2016). As such, parenchyma walls may  
643 influence the mechanical properties of wood, across-wall water and solute transport, and  
644 result in lower than expected parenchyma lumen fraction.

645

## 646 **Conclusions**

647 This work examined the anatomical correlates of wood water storage and day capacitance.  
648 Contrary to our expectations, tissue lumen fractions did not constrain capacitance. Instead,  
649 WD,  $VWC_{L-pd}$  and the connectivity between vessels and other tissues were more closely  
650 related to capacitance than were tissue lumen fractions. Our findings challenge several  
651 common assumptions: 1) that capacitance is positively related to parenchyma fraction, and  
652 2) that wood density is negatively correlated with water content in fresh samples. Given that

653 fresh wood was never saturated (mean  $RWC_{pd}$ :  $0.65 \pm 0.13$ ), we also question the functional  
654 relevance of capacitance estimated on saturated samples., at least in temperate species.  
655 Our study is limited by a lack of information on: 1) water distribution across and within growth  
656 rings, and 2) the combined and independent effects of wood, bark and pith. Addressing these  
657 issues would likely improve our understanding of capacitance and the anatomical traits that  
658 are aligned with it. Notwithstanding these limitations, our findings offer new insights into  
659 capacitance and its anatomical determinants, and suggest intriguing avenues for future  
660 research.

661

## 662 ACKNOWLEDGEMENTS

---

663 KZ and ER were supported by the Arnold Arboretum of Harvard University through the Postdoctoral  
664 Putnam Fellowship and the DaRin Butz Foundation Research Internship Program, respectively. We  
665 are grateful to all the Arnold Arboretum staff, and especially: Faye Rosin (Director of  
666 Research Facilitation), Living Collections, Horticulture, and the admin staff for excellent help  
667 and support. We also would like to cordially thank the Holbrook Lab at the Department of  
668 Organismic and Evolutionary Biology of Harvard University, for discussions about  
669 capacitance and providing a pressure chamber.

670

## 671 AUTHOR CONTRIBUTION

---

672 KZ designed the study and SMG and NMH contributed to concept and method development.  
673 KZ carried out fieldwork and lab measurements. KZ and ER performed anatomical analysis.  
674 KZ analysed the data and wrote first draft of the manuscript. All authors contributed to  
675 subsequent draft revisions.

676

## 677 CONFLICT OF INTEREST

---

678 The authors declare no conflict of interest.

679

680 REFERENCES

---

- 681
- 682 von Allmen E.I., Sperry J.S. & Bush S.E. (2015) Contrasting whole-tree water use,  
683 hydraulics, and growth in a co-dominant diffuse-porous vs. ring-porous species pair.  
684 *Trees* **29**, 717–728.
- 685 Begg J.E. & Turner N.C. (1970) Water Potential Gradients in Field Tobacco. *Plant*  
686 *Physiology* **46**, 343–346.
- 687 Blackman C.J., Pfautsch S., Choat B., Delzon S., Gleason S.M. & Duursma R.A. (2016)  
688 Toward an index of desiccation time to tree mortality under drought. *Plant, Cell &*  
689 *Environment* **39**, 2342–2345.
- 690 Borchert R. & Pockman W.T. (2005) Water storage capacitance and xylem tension in  
691 isolated branches of temperate and tropical trees. *Tree Physiology* **25**, 457–466.
- 692 Bush S.E., Pataki D.E., Hultine K.R., West A.G., Sperry J.S. & Ehleringer J.R. (2008) Wood  
693 anatomy constrains stomatal responses to atmospheric vapor pressure deficit in  
694 irrigated, urban trees. *Oecologia* **156**, 13–20.
- 695 Carrasco L.O., Bucci S.J., Francescantonio D.D., Lezcano O.A., Campanello P.I., Scholz  
696 F.G., ... Goldstein G. (2015) Water storage dynamics in the main stem of subtropical  
697 tree species differing in wood density, growth rate and life history traits. *Tree*  
698 *Physiology* **35**, 354–365.
- 699 Chapotin S.M., Razanameharizaka J.H. & Holbrook N.M. (2006a) Baobab trees (*Adansonia*)  
700 in Madagascar use stored water to flush new leaves but not to support stomatal  
701 opening before the rainy season. *New Phytologist* **169**, 549–559.
- 702 Chapotin S.M., Razanameharizaka J.H. & Holbrook N.M. (2006b) Water relations of baobab  
703 trees (*Adansonia* spp. L.) during the rainy season: does stem water buffer daily water  
704 deficits? *Plant, Cell & Environment* **29**, 1021–1032.
- 705 Christoffersen B.O., Gloor M., Fauset S., Fyllas N.M., Galbraith D.R., Baker T.R., ... Meir P.  
706 (2016) Linking hydraulic traits to tropical forest function in a size-structured and trait-  
707 driven model (TFS v.1-Hydro). *Geoscientific Model Development; Katlenburg-Lindau*  
708 **9**, 4227–4255.
- 709 Clearwater M.J. & Meinzer F.C. (2001) Relationships between hydraulic architecture and leaf  
710 photosynthetic capacity in nitrogen-fertilized *Eucalyptus grandis* trees. *Tree*  
711 *Physiology* **21**, 683–690.
- 712 Cochard H., Forestier S. & Améglio T. (2001) A new validation of the Scholander pressure  
713 chamber technique based on stem diameter variations. *Journal of Experimental*  
714 *Botany* **52**, 1361–1365.

- 715 De Schepper V., van Dusschoten D., Copini P., Jahnke S. & Steppe K. (2012) MRI links  
716 stem water content to stem diameter variations in transpiring trees. *Journal of*  
717 *Experimental Botany* **63**, 2645–2653.
- 718 Dlouhá J., Alméras T., Beauchêne J., Clair B. & Fournier M. (2018) Biophysical  
719 dependences among functional wood traits. *Functional Ecology* **32**, 2652–2665.
- 720 Fortunel C., Ruelle J., Beauchêne J., Fine P.V.A. & Baraloto C. (2014) Wood specific gravity  
721 and anatomy of branches and roots in 113 Amazonian rainforest tree species across  
722 environmental gradients. *New Phytologist* **202**, 79–94.
- 723 Fox J. & Weisberg S. (2011) *An {R} companion to applied regression.*, Second. Thousand  
724 Oaks CA: Sage.
- 725 Fujiwara S. (1992) Anatomy and properties of Japanese hardwoods II. Variation of  
726 dimensions of ray cells and their relation to basic density. *IAWA Bulletin n.s.* **13**, 397–  
727 402.
- 728 Fujiwara S., Sameshima K., Kuroda K. & Takamura N. (1991) Anatomy and properties of  
729 Japanese hardwoods. I. Variation of fibre dimensions and tissue proportions and their  
730 relation to basic density. *IAWA Bulletin n.s.* **12**, 419–24.
- 731 Gartner B., Moore J. & Gardiner B. (2004) Gas in stems: Abundance and potential  
732 consequences for tree biomechanics. *Tree physiology* **24**, 1239–50.
- 733 Gleason S.M., Blackman C.J., Cook A.M., Laws C.A. & Westoby M. (2014) Whole-plant  
734 capacitance, embolism resistance and slow transpiration rates all contribute to longer  
735 desiccation times in woody angiosperms from arid and wet habitats. *Tree Physiology*  
736 **34**, 275–284.
- 737 Goldstein G., Andrade J.L., Meinzer F.C., Holbrook N.M., Cavelier J., Jackson P. & Celis A.  
738 (1998) Stem water storage and diurnal patterns of water use in tropical forest canopy  
739 trees. *Plant, Cell & Environment* **21**, 397–406.
- 740 Goldstein G., Meinzer F. & Monasterio M. (1984) The role of capacitance in the water  
741 balance of Andean giant rosette species. *Plant, Cell & Environment* **7**, 179–186.
- 742 Hao G.-Y., Wheeler J.K., Holbrook N.M. & Goldstein G. (2013) Investigating xylem embolism  
743 formation, refilling and water storage in tree trunks using frequency domain  
744 reflectometry. *Journal of Experimental Botany*.
- 745 Holbrook N.M. (1995) Stem water storage. In *Plant stems: physiology and functional*  
746 *morphology*. pp. 151–174. Academic Press.
- 747 Holbrook N.M. & Sinclair T.R. (1992) Water balance in the arborescent palm, *Sabal palmetto*.  
748 II. Transpiration and stem water storage. *Plant, Cell & Environment* **15**, 401–409.
- 749 Hölttä T., Carrasco M.D.R.D., Salmon Y., Aalto J., Vanhatalo A., Bäck J. & Lintunen A.  
750 (2018) Water relations in silver birch during springtime: How is sap pressurised?  
751 *Plant Biology* **20**, 834–847.

- 752 Hölttä T., Cochard H., Nikinmaa E. & Mencuccini M. (2009) Capacitive effect of cavitation in  
753 xylem conduits: results from a dynamic model. *Plant, Cell & Environment* **32**, 10–21.  
754 ImageJ.
- 755 InsideWood (2004) Published on the Internet. <http://insidewood.lib.ncsu.edu>.
- 756 Irvine J. & Grace J. (1997) Continuous measurements of water tensions in the xylem of trees  
757 based on the elastic properties of wood. *Planta* **202**, 455–461.
- 758 Jupa R., Doubková P. & Gloser V. (2019) Ion-mediated increases in xylem hydraulic  
759 conductivity: seasonal differences between coexisting ring- and diffuse-porous  
760 temperate tree species. *Tree Physiology*.
- 761 Jupa R., Plavcová L., Gloser V. & Jansen S. (2016) Linking xylem water storage with  
762 anatomical parameters in five temperate tree species. *Tree Physiology* **36**, 756–769.
- 763 Kellogg R. & Wangaard F. (1969) Variation in the cell-wall density of wood. *Wood and Fiber*  
764 *Science* **1**, 180–204.
- 765 Kenzo T., Sano M., Yoneda R. & Chann S. (2017) Comparison of Wood Density and Water  
766 Content Between Dry Evergreen and Dry Deciduous Forest Trees in Central  
767 Cambodia. *Japan Agricultural Research Quarterly: JARQ* **51**, 363–374.
- 768 Kenzo T., Tomoaki I., Yuta I., Joseph Jawa K. & Sophal C. (2016) Wood density and water  
769 content in diverse species from lowland dipterocarp rainforest and dry dipterocarp  
770 forest. *Proceedings of the symposium “Frontier in tropical forest research: progress in*  
771 *joint projects between the Forest Department Sarawak and the Japan Research*  
772 *Consortium for Tropical Forests in Sarawak,”* 94–103.
- 773 Klein T. (2014) The variability of stomatal sensitivity to leaf water potential across tree  
774 species indicates a continuum between isohydric and anisohydric behaviours.  
775 *Functional Ecology* **28**, 1313–1320.
- 776 Knipfer T., Cuneo I.F., Earles J.M., Reyes C., Brodersen C.R. & McElrone A.J. (2017)  
777 Storage Compartments for Capillary Water Rarely Refill in an Intact Woody Plant.  
778 *Plant Physiology* **175**, 1649–1660.
- 779 Knipfer T., Reyes C., Earles J.M., Berry Z.C., Johnson D., Brodersen C.R. & McElrone A.J.  
780 (2019) Spatiotemporal coupling of vessel cavitation and discharge of stored xylem  
781 water in a tree sapling. *Plant Physiology*, pp.01303.2018.
- 782 Kobayashi Y. & Tanaka T. (2001) Water flow and hydraulic characteristics of Japanese red  
783 pine and oak trees. *Hydrological Processes* **15**, 1731–1750.
- 784 Köcher P., Horna V. & Leuschner C. (2013) Stem water storage in five coexisting temperate  
785 broad-leaved tree species: significance, temporal dynamics and dependence on tree  
786 functional traits. *Tree Physiology* **33**, 817–832.

- 787 Lachenbruch B. & McCulloh K.A. (2014) Traits, properties, and performance: how woody  
788 plants combine hydraulic and mechanical functions in a cell, tissue, or whole plant.  
789 *New Phytologist* **204**, 747–764.
- 790 Li X., Blackman C.J., Choat B., Duursma R.A., Rymer P.D., Medlyn B.E. & Tissue D.T.  
791 (2018) Tree hydraulic traits are coordinated and strongly linked to climate-of-origin  
792 across a rainfall gradient. *Plant, Cell & Environment* **41**, 646–660.
- 793 Lintunen A., Lindfors L., Nikinmaa E. & Hölttä T. (2017) Xylem diameter changes during  
794 osmotic stress, desiccation and freezing in *Pinus sylvestris* and *Populus tremula*.  
795 *Tree Physiology* **37**, 491–500.
- 796 Longuetaud F., Mothe F., Fournier M., Dlouha J., Santenoise P. & Deleuze C. (2016) Within-  
797 stem maps of wood density and water content for characterization of species: a case  
798 study on three hardwood and two softwood species. *Annals of Forest Science* **73**,  
799 601–614.
- 800 Longuetaud F., Mothe F., Santenoise P., Diop N., Dlouha J., Fournier M. & Deleuze C.  
801 (2017) Patterns of within-stem variations in wood specific gravity and water content  
802 for five temperate tree species. *Annals of Forest Science* **74**, 64.
- 803 Martínez-Cabrera H.I., Jones C.S., Espino S. & Schenk H.J. (2009) Wood anatomy and  
804 wood density in shrubs: responses to varying aridity along transcontinental transects.  
805 *American Journal of Botany* **96**, 1388–1398.
- 806 Mason Earles J., Sperling O., Silva L.C.R., McElrone A.J., Brodersen C.R., North M.P. &  
807 Zwieniecki M.A. (2016) Bark water uptake promotes localized hydraulic recovery in  
808 coastal redwood crown. *Plant, Cell & Environment* **39**, 320–328.
- 809 McCulloh K.A., Johnson D.M., Meinzer F.C., Voelker S.L., Lachenbruch B. & Domec J.-C.  
810 (2012) Hydraulic architecture of two species differing in wood density: opposing  
811 strategies in co-occurring tropical pioneer trees. *Plant, Cell & Environment* **35**, 116–  
812 125.
- 813 Meinzer F.C., Campanello P.I., Domec J.-C., Gatti M.G., Goldstein G., Villalobos-Vega R. &  
814 Woodruff D.R. (2008) Constraints on physiological function associated with branch  
815 architecture and wood density in tropical forest trees. *Tree Physiology* **28**, 1609–  
816 1617.
- 817 Meinzer F.C., James S.A. & Goldstein G. (2004) Dynamics of transpiration, sap flow and use  
818 of stored water in tropical forest canopy trees. *Tree Physiology* **24**, 901–909.
- 819 Meinzer F.C., James S.A., Goldstein G. & Woodruff D. (2003) Whole-tree water transport  
820 scales with sapwood capacitance in tropical forest canopy trees. *Plant, Cell &*  
821 *Environment* **26**, 1147–1155.



- 822 Meinzer F.C., Johnson D.M., Lachenbruch B., McCulloh K.A. & Woodruff D.R. (2009) Xylem  
823 hydraulic safety margins in woody plants: coordination of stomatal control of xylem  
824 tension with hydraulic capacitance. *Functional Ecology* **23**, 922–930.
- 825 Morris H., Plavcová L., Cvecko P., Fichtler E., Gillingham M.A.F., Martínez-Cabrera H.I., ...  
826 Jansen S. (2016) A global analysis of parenchyma tissue fractions in secondary  
827 xylem of seed plants. *New Phytologist* **209**, 1553–1565.
- 828 Nardini A., Savi T., Trifilò P. & Lo Gullo M.A. (2018) Drought Stress and the Recovery from  
829 Xylem Embolism in Woody Plants. In *Progress in Botany Vol. 79*. Progress in Botany,  
830 (eds F.M. Cánovas, U. Lüttge & R. Matyssek), pp. 197–231. Springer International  
831 Publishing, Cham.
- 832 Ogunwusi A. a & Ibrahim H.D. (2017) Variations in Axial and Ray Parenchyma Cells in Ten  
833 Hardwood Species Growing in Nigeria. *Journal of Resources Development and*  
834 *Management* **38**, 64-68–68.
- 835 Pfautsch S., Hölttä T. & Mencuccini M. (2015a) Hydraulic functioning of tree stems—fusing  
836 ray anatomy, radial transfer and capacitance. *Tree Physiology* **35**, 706–722.
- 837 Pfautsch S., Renard J., Tjoelker M.G. & Salih A. (2015b) Phloem as Capacitor: Radial  
838 Transfer of Water into Xylem of Tree Stems Occurs via Symplastic Transport in Ray  
839 Parenchyma. *Plant Physiology* **167**, 963–971.
- 840 Phillips N.G., Ryan M.G., Bond B.J., McDowell N.G., Hinckley T.M. & Čermák J. (2003)  
841 Reliance on stored water increases with tree size in three species in the Pacific  
842 Northwest. *Tree Physiology* **23**, 237–245.
- 843 Plavcová L. & Jansen S. (2015) The Role of Xylem Parenchyma in the Storage and  
844 Utilization of Nonstructural Carbohydrates. In *Functional and Ecological Xylem*  
845 *Anatomy*. (ed U. Hacke), pp. 209–234. Springer International Publishing.
- 846 Pratt R.B. & Jacobsen A.L. (2017) Conflicting demands on angiosperm xylem: Tradeoffs  
847 among storage, transport and biomechanics. *Plant, Cell & Environment* **40**, 897–913.
- 848 Pratt R.B., Jacobsen A.L., Ewers F.W. & Davis S.D. (2007) Relationships among xylem  
849 transport, biomechanics and storage in stems and roots of nine Rhamnaceae species  
850 of the California chaparral. *New Phytologist* **174**, 787–798.
- 851 R Core Team (2018) *R: A language and environment for statistical computing*. R Foundation  
852 for Statistical Computing, Vienna, Austria.
- 853 Richards A.E., Wright I.J., Lenz T.I. & Zanne A.E. (2014) Sapwood capacitance is greater in  
854 evergreen sclerophyll species growing in high compared to low-rainfall environments.  
855 *Functional Ecology* **28**, 734–744.
- 856 Rosner S., Karlsson B., Konnerth J. & Hansmann C. (2009) Shrinkage processes in  
857 standard-size Norway spruce wood specimens with different vulnerability to  
858 cavitation. *Tree Physiology* **29**, 1419–1431.

- 859 Ross R.J. ed. (2010) *Wood handbook: wood as an engineering material*, Centennial. US  
860 Department of Agriculture. USDA Forest Service. Forest Products Laboratory,  
861 Madison, WI, USA.
- 862 Rungwattana K. & Hietz P. (2018) Radial variation of wood functional traits reflect size-  
863 related adaptations of tree mechanics and hydraulics. *Functional Ecology* **32**, 260–  
864 272.
- 865 Salomón R.L., Limousin J.-M., Ourcival J.-M., Rodríguez-Calcerrada J. & Steppe K. (2017)  
866 Stem hydraulic capacitance decreases with drought stress: implications for modelling  
867 tree hydraulics in the Mediterranean oak *Quercus ilex*. *Plant, Cell & Environment* **40**,  
868 1379–1391.
- 869 Santiago L.S., De Guzman M.E., Baraloto C., Vogenberg J.E., Brodie M., Hérault B., ...  
870 Bonal D. (2018) Coordination and trade-offs among hydraulic safety, efficiency and  
871 drought avoidance traits in Amazonian rainforest canopy tree species. *New*  
872 *Phytologist*, n/a-n/a.
- 873 Schneider C.A., Rasband W.S. & Eliceiri K.W. (2012) NIH Image to ImageJ: 25 years of  
874 image analysis. *Nature Methods* **9**, 671–675.
- 875 Scholz F.C., Bucci S.J., Goldstein G., Meinzer F.C., Franco A.C. & Miralles-Wilhelm F.  
876 (2008) Temporal dynamics of stem expansion and contraction in savanna trees:  
877 withdrawal and recharge of stored water. *Tree Physiology* **28**, 469–480.
- 878 Scholz F.G., Bucci S.J., Goldstein G., Meinzer F.C., Franco A.C. & Miralles-Wilhelm F.  
879 (2007) Biophysical properties and functional significance of stem water storage  
880 tissues in Neotropical savanna trees. *Plant, Cell & Environment* **30**, 236–248.
- 881 Scholz F.G., Phillips N.G., Bucci S.J., Meinzer F.C. & Goldstein G. (2011) Hydraulic  
882 Capacitance: Biophysics and Functional Significance of Internal Water Sources in  
883 Relation to Tree Size. In *Size- and Age-Related Changes in Tree Structure and*  
884 *Function*. Tree Physiology, (eds F.C. Meinzer, B. Lachenbruch & T.E. Dawson), pp.  
885 341–361. Springer Netherlands.
- 886 Secchi F., Pagliarani C. & Zwieniecki M.A. (2017) The functional role of xylem parenchyma  
887 cells and aquaporins during recovery from severe water stress. *Plant, Cell &*  
888 *Environment* **40**, 858–871.
- 889 Sevanto S., Hölttä T. & Holbrook N.M. (2011) Effects of the hydraulic coupling between  
890 xylem and phloem on diurnal phloem diameter variation: Xylem-phloem hydraulic  
891 coupling and phloem diameter variation. *Plant, Cell & Environment* **34**, 690–703.
- 892 Siddiq Z., Zhang Y.-J., Zhu S.-D. & Cao K.-F. (2019) Canopy water status and  
893 photosynthesis of tropical trees are associated with trunk sapwood hydraulic  
894 properties. *Plant Physiology and Biochemistry* **139**, 724–730.

- 895 Sperry J.S., Nichols K.L., Sullivan J.E.M. & Eastlack S.E. (1994) Xylem embolism in ring-  
896 porous, diffuse-porous, and coniferous trees of Northern Utah and Interior Alaska.  
897 *Ecology* **75**, 1736–1752.
- 898 Steppe K. & Lemeur R. (2007) Effects of ring-porous and diffuse-porous stem wood anatomy  
899 on the hydraulic parameters used in a water flow and storage model. *Tree Physiology*  
900 **27**, 43–52.
- 901 Suzuki E. (1999) Diversity in specific gravity and water content of wood among Bornean  
902 tropical rainforest trees. *Ecological Research* **14**, 211–224.
- 903 Trifilò P., Nardini A., Gullo M.A.L., Barbera P.M., Savi T. & Raimondo F. (2015) Diurnal  
904 changes in embolism rate in nine dry forest trees: relationships with species-specific  
905 xylem vulnerability, hydraulic strategy and wood traits. *Tree Physiology* **35**, 694–705.
- 906 Tyree M.T. & Yang S. (1990) Water-storage capacity of *Thuja*, *Tsuga* and *Acer* stems  
907 measured by dehydration isotherms. *Planta* **182**, 420–426.
- 908 Umabayashi T., Utsumi Y., Koga S., Inoue S., Fujikawa S., Arakawa K., ... Oda K. (2008)  
909 Conducting pathways in north temperate deciduous broadleaved trees. *IAWA Journal*  
910 **29**, 247–263.
- 911 Umabayashi T., Utsumi Y., Koga S., Inoue S., Matsumura J., Oda K., ... Otsuki K. (2010)  
912 Xylem water-conducting patterns of 34 broadleaved evergreen trees in southern  
913 Japan. *Trees* **24**, 571–583.
- 914 Vergeynst L.L., Dierick M., Bogaerts J.A.N., Cnudde V. & Steppe K. (2015) Cavitation: a  
915 blessing in disguise? New method to establish vulnerability curves and assess  
916 hydraulic capacitance of woody tissues. *Tree Physiology* **35**, 400–409.
- 917 Warton D.I., Duursma R.A., Falster D.S. & Taskinen S. (2011) smatr 3– an R package for  
918 estimation and inference about allometric lines. *Methods in Ecology and Evolution*.
- 919 Wei T. & Simko V. (2017) R package “corrplot”: visualization of a corelation matrix (Version  
920 0.84).
- 921 Wheeler E.A. (2011) InsideWood - a web resource for hardwood anatomy. *IAWA Journal* **32**,  
922 199–211.
- 923 Wolfe B.T. & Kursar T.A. (2015) Diverse patterns of stored water use among saplings in  
924 seasonally dry tropical forests. *Oecologia* **179**, 925–936.
- 925 Zanne A.E., Westoby M., Falster D.S., Ackerly D.D., Loarie S.R., Arnold S.E.J. & Coomes  
926 D.A. (2010) Angiosperm wood structure: global patterns in vessel anatomy and their  
927 relation to wood density and potential conductivity. *American Journal of Botany* **97**,  
928 207–215.
- 929 Zhang Y.-J., Meinzer F.C., Qi J.-H., Goldstein G. & Cao K.-F. (2013) Midday stomatal  
930 conductance is more related to stem rather than leaf water status in subtropical  
931 deciduous and evergreen broadleaf trees. *Plant, Cell & Environment* **36**, 149–158.

- 932 Zheng J. & Martínez-Cabrera H.I. (2013) Wood anatomical correlates with theoretical  
933 conductivity and wood density across China: evolutionary evidence of the functional  
934 differentiation of axial and radial parenchyma. *Annals of Botany* **112**, 927–935.
- 935 Ziemińska K., Butler D.W., Gleason S.M., Wright I.J. & Westoby M. (2013) Fibre wall and  
936 lumen fractions drive wood density variation across 24 Australian angiosperms. *AoB*  
937 *PLANTS* **5**.
- 938 Ziemińska K., Westoby M. & Wright I.J. (2015) Broad Anatomical Variation within a Narrow  
939 Wood Density Range—A Study of Twig Wood across 69 Australian Angiosperms.  
940 *PLoS ONE* **10**, e0124892.
- 941 Zimmermann M.H. (1983) *Xylem Structure and the Ascent of Sap*. Springer-Verlag.  
942

943 TABLES

944

945 Table 1. Species list, their abbreviations and porosity type.

946

| Family            | Species                                           | Abbr | Porosity  |
|-------------------|---------------------------------------------------|------|-----------|
| Sapindaceae       | <i>Acer saccharum</i>                             | ace  | Diffuse   |
| Sapindaceae       | <i>Aesculus turbinata</i>                         | aes  | Diffuse   |
| Betulaceae        | <i>Betula dahurica</i>                            | bet  | Diffuse   |
| Cercidiphyllaceae | <i>Cercidiphyllum japonicum</i>                   | cer  | Diffuse   |
| Cornaceae         | <i>Cornus kousa</i>                               | cor  | Diffuse   |
| Eucommiaceae      | <i>Eucommia ulmoides</i>                          | euc  | Diffuse   |
| Fagaceae          | <i>Fagus grandifolia</i>                          | fag  | Diffuse   |
| Altingiaceae      | <i>Liquidambar styraciflua</i>                    | liq  | Diffuse   |
| Magnoliaceae      | <i>Liriodendron tulipifera</i>                    | lir  | Diffuse   |
| Magnoliaceae      | <i>Magnolia cylindrica</i>                        | mag  | Diffuse   |
| Ericaceae         | <i>Oxydendrum arboreum</i>                        | oxy  | Diffuse   |
| Theaceae          | <i>Stewartia pseudocamellia</i>                   | ste  | Diffuse   |
| Styracaceae       | <i>Styrax obassia</i>                             | sty  | Diffuse   |
| Tiliaceae         | <i>Tilia japonica</i>                             | til  | Diffuse   |
| Fabaceae          | <i>Albizia julibrissin</i>                        | alb  | Semi-ring |
| Bignoniaceae      | <i>Catalpa speciosa</i>                           | cat  | Semi-ring |
| Fabaceae          | <i>Cladrastis kentukea</i>                        | cla  | Semi-ring |
| Ebenaceae         | <i>Diospyros virginiana</i>                       | dio  | Semi-ring |
| Fabaceae          | <i>Gleditsia triacanthos</i>                      | gle  | Semi-ring |
| Scrophulariaceae  | <i>Paulownia tomentosa</i> var. 'Coreana'         | pau  | Semi-ring |
| Juglandaceae      | <i>Carya laciniosa</i>                            | car  | Ring      |
| Oleaceae          | <i>Fraxinus angustifolia</i> ssp. <i>oxycarpa</i> | fra  | Ring      |
| Moraceae          | <i>Maclura pomifera</i>                           | mac  | Ring      |
| Moraceae          | <i>Morus alba</i>                                 | mor  | Ring      |
| Rutaceae          | <i>Phellodendron amurense</i>                     | phe  | Ring      |
| Simaroubaceae     | <i>Picrasma quassioides</i>                       | pic  | Ring      |
| Fagaceae          | <i>Quercus muehlenbergii</i>                      | que  | Ring      |
| Lauraceae         | <i>Sassafras albidum</i>                          | sas  | Ring      |
| Rutaceae          | <i>Tetradium daniellii</i>                        | tet  | Ring      |
| Ulmaceae          | <i>Zelkova sinica</i>                             | zel  | Ring      |

947

948 Table 2. Traits, abbreviations and units. Fractions of wall (w), lumen (l) and wall+lumen (w+l)  
 949 of a given tissue were measured. Subscripts denote: lumen (L), predawn (pd), midday (md)  
 950 and difference between predawn and midday (pd-md).  
 951

| Trait                                              | Abbr                                                                | Units                                |
|----------------------------------------------------|---------------------------------------------------------------------|--------------------------------------|
| Day capacitance                                    | capacitance                                                         | kg m <sup>-3</sup> MPa <sup>-1</sup> |
| Cumulative water released                          | CWR <sub>pd</sub> , CWR <sub>md</sub> , ΔCWR <sub>md-pd</sub>       | kg m <sup>-3</sup>                   |
| Stem water potential                               | Ψ <sub>pd</sub> , Ψ <sub>md</sub> , ΔΨ <sub>pd-md</sub>             | MPa                                  |
| Volumetric water content                           | VWC <sub>pd</sub> , VWC <sub>md</sub> , ΔVWC <sub>pd-md</sub>       | Unitless                             |
| Volumetric water content: saturated                | VWC <sub>sat</sub>                                                  | "                                    |
| Lumen volumetric water content                     | VWC <sub>L-pd</sub> , VWC <sub>L-md</sub> , ΔVWC <sub>L-pd-md</sub> | "                                    |
| Lumen volumetric water content: saturated          | VWC <sub>L-sat</sub>                                                | "                                    |
| Wall volumetric water content                      | VWC <sub>w</sub>                                                    | "                                    |
| Relative water content                             | RWC <sub>pd</sub> , RWC <sub>md</sub> , ΔRWC <sub>pd-md</sub>       | "                                    |
| Lumen relative water content                       | RWC <sub>L-pd</sub> , RWC <sub>L-md</sub> , ΔRWC <sub>L-pd-md</sub> | "                                    |
| Wood density                                       | WD                                                                  | g cm <sup>-3</sup>                   |
| Fibre fraction: w, l, w+l                          |                                                                     | Unitless                             |
| Axial+ray parenchyma fraction: w, l, w+l           |                                                                     | "                                    |
| Axial parenchyma fraction: w, l, w+l               |                                                                     | "                                    |
| Ray fraction: w, l, w+l                            |                                                                     | "                                    |
| Vessel fraction: w, l, w+l                         |                                                                     | "                                    |
| Living fibre fraction: w, l, w+l                   |                                                                     | "                                    |
| Conduits <sub>15</sub> fraction: w+l               |                                                                     | "                                    |
| Vessel-fibre contact fraction                      |                                                                     | "                                    |
| Vessel-axial+ray parenchyma contact fraction       |                                                                     | "                                    |
| Vessel-axial parenchyma contact fraction           |                                                                     | "                                    |
| Vessel-ray contact fraction                        |                                                                     | "                                    |
| Vessel-vessel contact fraction                     |                                                                     | "                                    |
| Vessel-conduits <sub>15</sub> contact fraction     |                                                                     | "                                    |
| Vessel mean area                                   |                                                                     | μm <sup>2</sup>                      |
| Vessel mean diameter                               |                                                                     | μm                                   |
| Hydraulically weighted vessel diameter             | D <sub>H</sub>                                                      | "                                    |
| Vessel number per area                             |                                                                     | mm <sup>-2</sup>                     |
| Vessel size to number ratio                        |                                                                     | mm <sup>2</sup> mm <sup>-2</sup>     |
| Lumen fraction per total fibre area                | lumen fraction <sub>fibre</sub>                                     | Unitless                             |
| Lumen fraction per total axial+ray parenchyma area | lumen fraction <sub>axial+ray</sub>                                 | "                                    |
| Lumen fraction per total axial parenchyma area     | lumen fraction <sub>axial</sub>                                     | "                                    |
| Lumen fraction per total rays area                 | lumen fraction <sub>ray</sub>                                       | "                                    |
| Lumen fraction per total vessels area              | lumen fraction <sub>vessel</sub>                                    | "                                    |
| Lumen fraction per total living fibres area        | lumen fraction <sub>living fibre</sub>                              | "                                    |

952  
 953

954 Table 3. Best models predicting wood capacitance, based on  $r^2$  (for bivariate) or  $r_{adj}^2$  (for multiple  
 955 models). Analysed were lumen fractions of: fibre, vessel, axial parenchyma, ray parenchyma,  
 956 axial+ray parenchyma, and contact fractions: vessel-fibre, vessel-vessel, vessel-axial parenchyma,  
 957 vessel-ray parenchyma, vessel-axial+ray parenchyma. Three best models with  $P < 0.1$  are shown. For  
 958 all species ( $n=29$ , excluding *Paulownia tomentosa*), we allowed maximum three explanatory variables,  
 959 and for diffuse-porous ( $n=14$ ) and ring/semi-ring-porous ( $n=15$ ) species, we allowed maximum two  
 960 explanatory variables, to avoid model overfitting. For models including vessel-fibre contact fraction  
 961 among ring/semi-ring-porous species one outlier was removed (*Sassafras albidum*, see Fig. 5).  $VWC_{L-pd}$ :  
 962 lumen volumetric water content at predawn, WD: wood density, axial: axial parenchyma. Bold:  $r^2$  or  
 963  $r_{adj}^2 > 0.5$ , regular:  $0.4 < r^2$  or  $r_{adj}^2 < 0.5$ , grey:  $r^2$  or  $r_{adj}^2 < 0.4$ . Significance levels: '\*\*\*\*'  $P < 0.001$ , '\*\*'  $P < 0.01$ ,  
 964 '\*'  $P < 0.05$ , '.'  $P < 0.1$ , 'ns'  $P > 0.1$ .

| Species group                                                     | Model rank | Model predicting capacitance                                                          | $r^2/r_{adj}^2$ | P     |
|-------------------------------------------------------------------|------------|---------------------------------------------------------------------------------------|-----------------|-------|
| Bivariate                                                         |            |                                                                                       |                 |       |
| All species                                                       | 1          | - WD***                                                                               | 0.35            | 0.001 |
|                                                                   | 2          | + $VWC_{L-pd}$ **                                                                     | 0.29            | 0.003 |
| Diffuse                                                           | 1          | - average vessel area*                                                                | 0.30            | 0.041 |
|                                                                   | 2          | - WD.                                                                                 | 0.25            | 0.069 |
| Ring/semi-ring                                                    | 1          | + $VWC_{L-pd}$ **                                                                     | 0.41            | 0.010 |
|                                                                   | 2          | - WD*                                                                                 | 0.37            | 0.016 |
| $VWC_{L-pd} + WD$                                                 |            |                                                                                       |                 |       |
| All species                                                       | na         | + $VWC_{L-pd}$ * - WD**                                                               | 0.44            | 0.000 |
| Diffuse                                                           | na         | + $VWC_{L-pd}$ <sup>ns</sup> - WD.                                                    | 0.23            | 0.095 |
| Ring/semi-ring                                                    | na         | + $VWC_{L-pd}$ ** - WD*                                                               | <b>0.59</b>     | 0.002 |
| $VWC_{L-pd} + WD + \text{tissue fractions}$                       |            |                                                                                       |                 |       |
| All species                                                       | 1          | + $VWC_{L-pd}$ ** - WD** + axial lumen fraction <sup>ns</sup>                         | 0.47            | 0.000 |
|                                                                   | 2          | + $VWC_{L-pd}$ ** - WD* - ray lumen fraction <sup>ns</sup>                            | 0.46            | 0.000 |
|                                                                   | 3          | + $VWC_{L-pd}$ ** - WD* - vessel lumen fraction <sup>ns</sup>                         | 0.43            | 0.001 |
| $VWCL-pd + WD + \text{contact fractions}$                         |            |                                                                                       |                 |       |
| All species                                                       | 1          | + $VWC_{L-pd}$ *** - WD*** + vessel-axial contact fraction**                          | <b>0.56</b>     | 0.000 |
|                                                                   | 2          | + $VWC_{L-pd}$ *** - WD*** - vessel-fibre contact fraction*                           | <b>0.54</b>     | 0.000 |
|                                                                   | 3          | + $VWC_{L-pd}$ ** - WD** - vessel-ray contact fraction*                               | <b>0.54</b>     | 0.000 |
| $VWC_{L-pd} + \text{tissue fractions}$                            |            |                                                                                       |                 |       |
| All species                                                       | 1          | + $VWC_{L-pd}$ *** + fibre lumen fraction. - ray lumen fraction.                      | 0.42            | 0.001 |
|                                                                   | 2          | + $VWC_{L-pd}$ *** + fibre lumen fraction** + axial lumen fraction <sup>ns</sup>      | 0.40            | 0.001 |
|                                                                   | 3          | + $VWC_{L-pd}$ *** + fibre lumen fraction*                                            | 0.38            | 0.001 |
| Diffuse                                                           | 1          | + $VWC_{L-pd}$ . + fibre lumen fraction.                                              | 0.25            | 0.081 |
| Ring/semi-ring                                                    | 1          | + $VWC_{L-pd}$ ** + vessel lumen fraction*                                            | <b>0.55</b>     | 0.003 |
|                                                                   | 2          | + $VWC_{L-pd}$ ** - axial+ray lumen fraction*                                         | <b>0.55</b>     | 0.003 |
|                                                                   | 3          | + $VWC_{L-pd}$ ** + fibre lumen fraction.                                             | <b>0.50</b>     | 0.006 |
| $VWC_{L-pd} + \text{contact fractions}$                           |            |                                                                                       |                 |       |
| All species                                                       | 1          | + $VWC_{L-pd}$ *** + vessel-vessel contact fraction* + vessel-axial contact fraction* | 0.42            | 0.001 |
|                                                                   | 2          | + $VWC_{L-pd}$ *** - vessel-ray contact fraction*                                     | 0.41            | 0.000 |
|                                                                   | 3          | + $VWC_{L-pd}$ *** + vessel-vessel contact fraction.                                  | 0.32            | 0.003 |
| Diffuse                                                           | 1          | + $VWC_{L-pd}$ ** - vessel-ray contact fraction**                                     | <b>0.52</b>     | 0.007 |
|                                                                   | 2          | + $VWC_{L-pd}$ * + vessel-vessel contact fraction*                                    | 0.41            | 0.022 |
| Ring/semi-ring                                                    | 1          | + $VWC_{L-pd}$ ** + vessel-fibre contact fraction*                                    | <b>0.62</b>     | 0.002 |
| $VWC_{L-pd} + \text{tissue fractions} + \text{contact fractions}$ |            |                                                                                       |                 |       |
| All species                                                       | 1          | + $VWC_{L-pd}$ *** + fibre lumen fraction* - vessel-ray contact fraction*             | <b>0.50</b>     | 0.000 |
|                                                                   | 2          | + $VWC_{L-pd}$ *** + fibre lumen fraction** + vessel-axial contact fraction*          | 0.48            | 0.000 |
|                                                                   | 3          | + $VWC_{L-pd}$ *** + fibre lumen fraction** - vessel-fibre contact fraction*          | 0.47            | 0.000 |

965

966 FIGURES

967

968 Figure 1. Illustration of the method used to estimate vessel-tissuecontact fractions between  
969 vessels and other tissues (fibres, axial parenchyma, rays, vessels, conduits<sub>15</sub>). The image  
970 shows fragment of a cross-section of *Fraxinus angustifolia* ssp. *oxycarpa*. Yellow dots  
971 distributed on vessel (black) circumference are classified based on the tissue in contact with  
972 a vessel (1 - axial parenchyma, 2 - rays, 3 - fibres, 4 - vessels; conduits<sub>15</sub> - not shown).

973

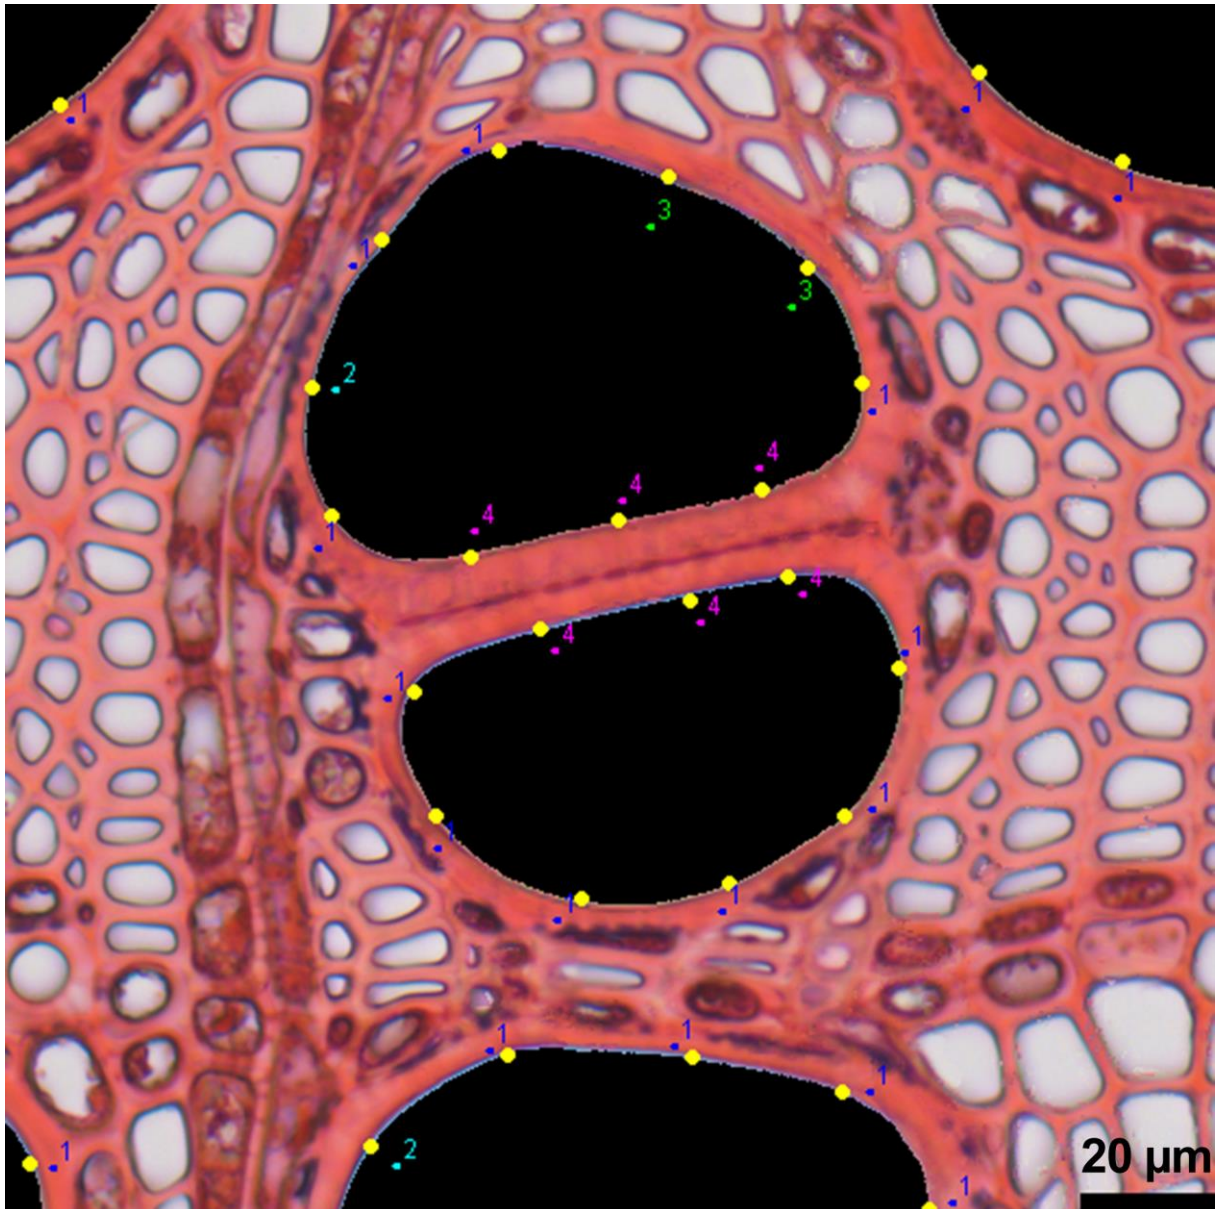

974

975



976 Figure 2. Tissue fractions sorted along axial+ray parenchyma fraction (a) and vessel-tissue  
 977 contact fractions sorted along vessel-axial+ray parenchyma contact fraction (b). Three-letter  
 978 codes denote species (Table 1).  
 979

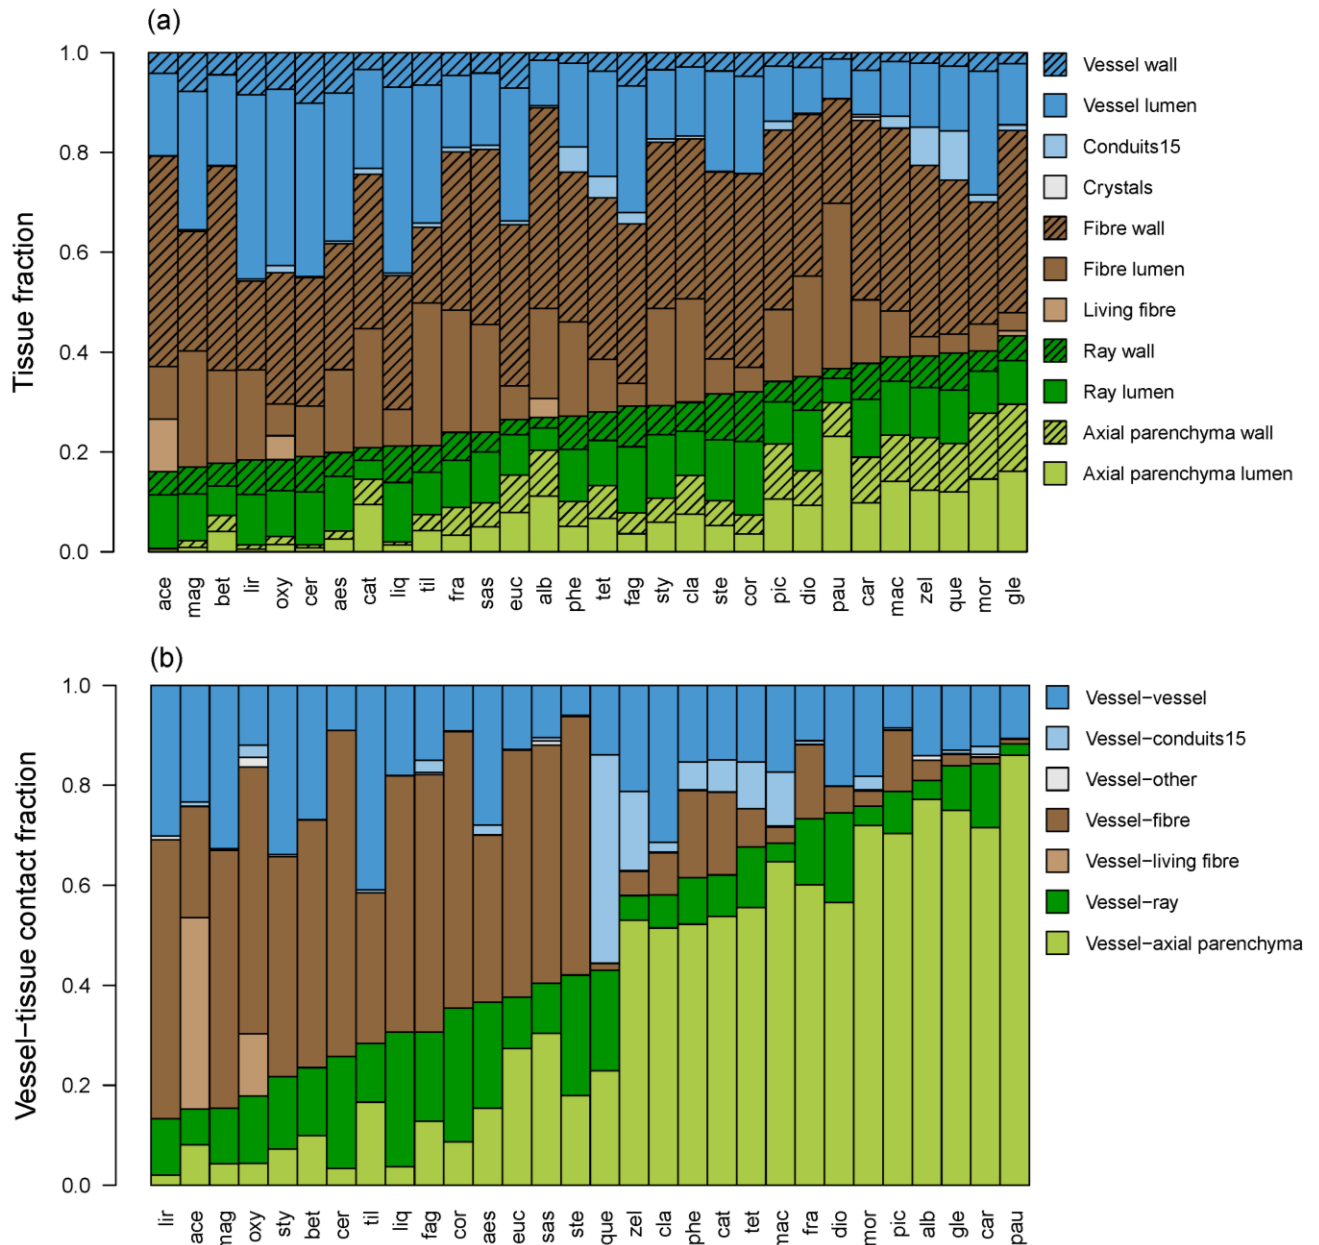

980

981

982 Figure 3. Boxplots illustrating differences between diffuse-porous (D, n=14), semi-ring-porous  
 983 (SR, n=6) and ring-porous species (R, n=10). Circles denote species averages. Traits  
 984 shown: wood density (WD), tissue fractions (F), vessel-tissue contact fractions (CF),  
 985 hydraulically weighted diameter ( $D_H$ ), vessel size to number ratio (S), predawn lumen  
 986 volumetric water content ( $VWC_{L-pd}$ ), predawn relative water content ( $RWC_{pd}$ ), midday to  
 987 predawn difference in cumulative water released ( $\Delta CWR_{md-pd}$ ) and capacitance. An outlier is  
 988 *Paulownia tomentosa* (pau).

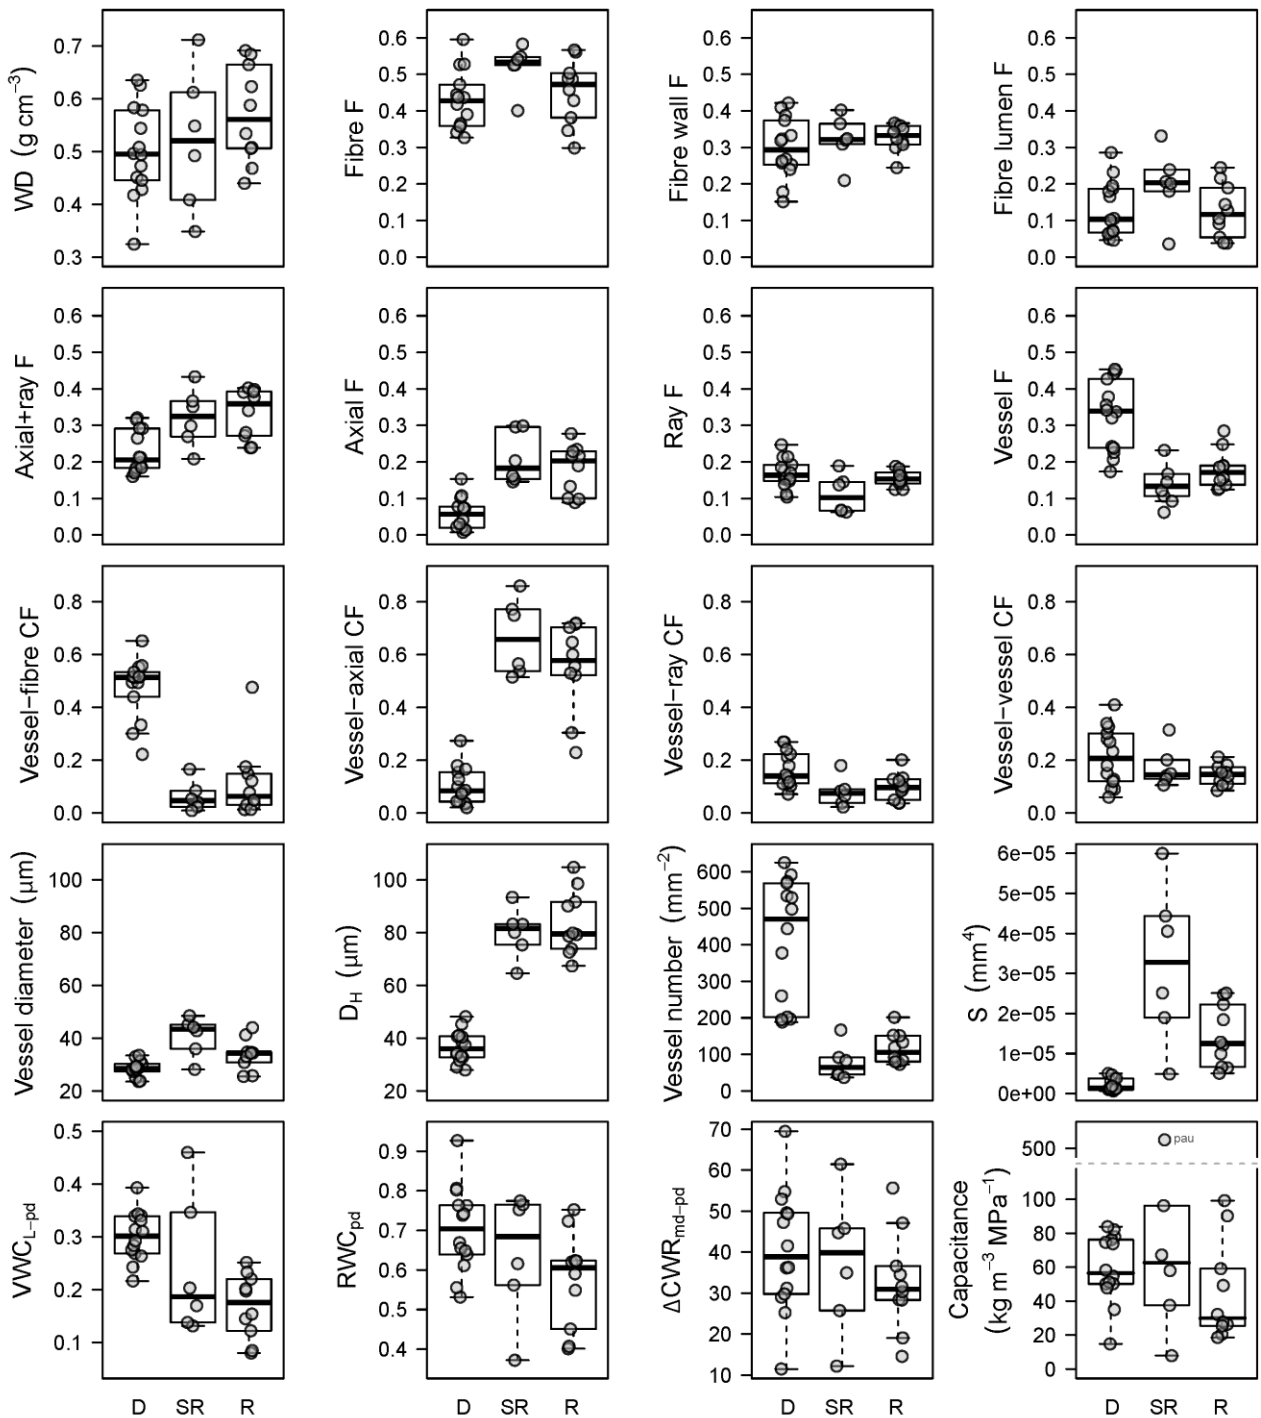

989

990 Figure 4. Relationships between tissue fractions (F): fibre fraction vs. vessel fraction (a), fibre  
991 fraction vs. axial+ray parenchyma fraction (b), and vessel fraction vs. axial+ray parenchyma  
992 fraction (c). Legends illustrate trait used to scale bubble size and porosity type.  
993

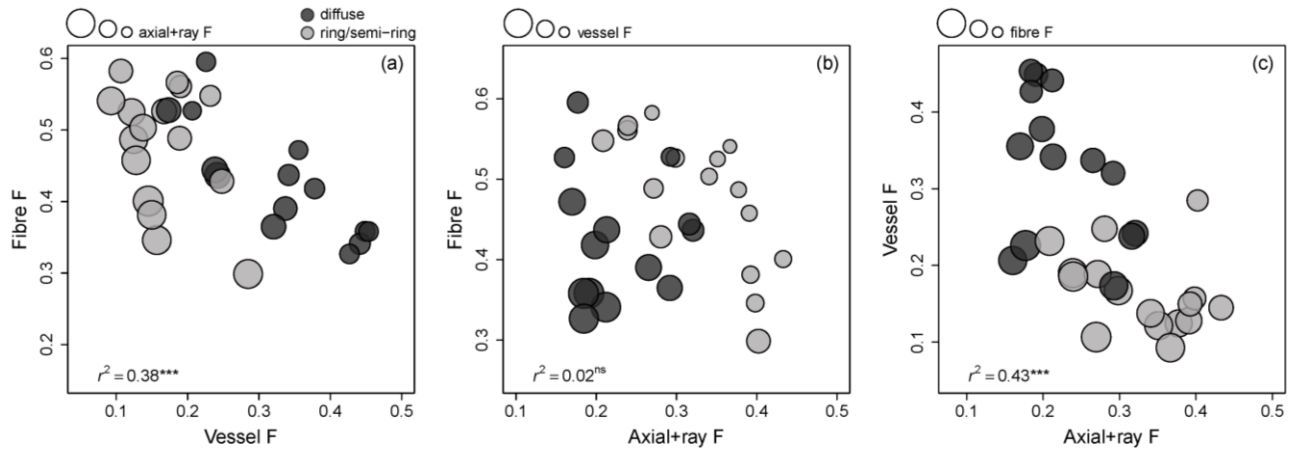

994

995

996 Figure 5. Relationship between vessel-axial parenchyma contact fraction and vessel-fibre  
997 contact fraction. CF: contact fraction. Legend displays porosity type.  $R^2$  is across all species.  
998 Outliers are *Quercus muehlenbergii* (que) and *Sassafras albidum* (sas). Legend illustrates  
999 porosity type.  
1000

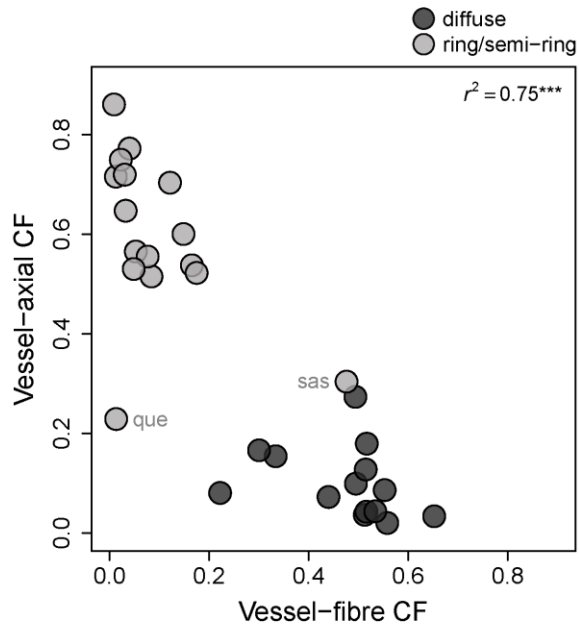

1001  
1002

1003 Figure 6. Barplot showing predawn and midday relative water content (RWC)  $\pm$  1 SD bars in  
1004 diffuse-porous (a) and ring/semi-ring-porous species (b). Three-letter codes denote species  
1005 (Table 1).  
1006

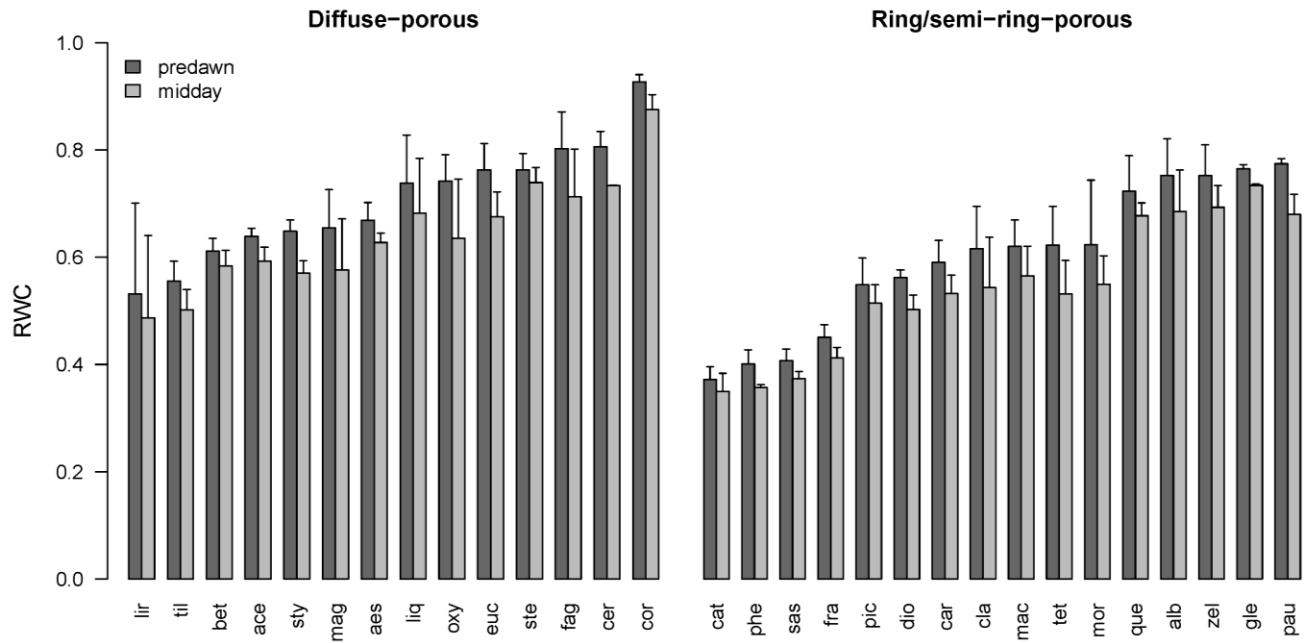

1007  
1008

1009 Figure 7. Relationships between water content and tissue lumen fractions (F): predawn  
1010 lumen volumetric water content ( $VWC_{L-pd}$ ) vs. vessel lumen fraction (a) and predawn lumen  
1011 relative water content ( $RWC_{L-pd}$ ) vs. fibre lumen fraction (b). Legend displays porosity type.  $r^2$   
1012 is across all species excluding *Paulownia tomentosa* (pau).  
1013

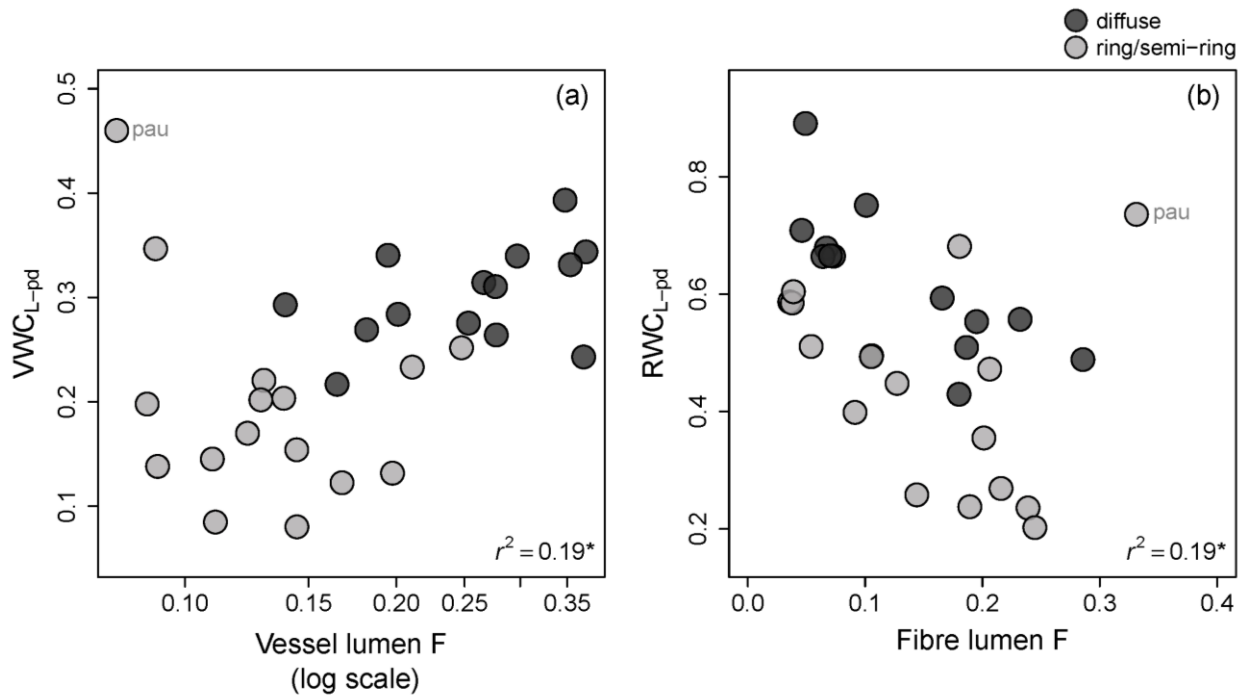

1014  
1015

1016 Figure 8. Relationships between capacitance and: wood density (WD, (a)), predawn lumen  
1017 volumetric water content ( $VWC_{L-pd}$ , (b)), axial+ray parenchyma lumen fraction (axial+ray  
1018 lumen F, (c)), and vessel lumen fraction (vessel lumen F, (d)). Legend displays porosity type.  
1019  $R^2$  values are across all species, excluding *Paulownia tomentosa* (pau).

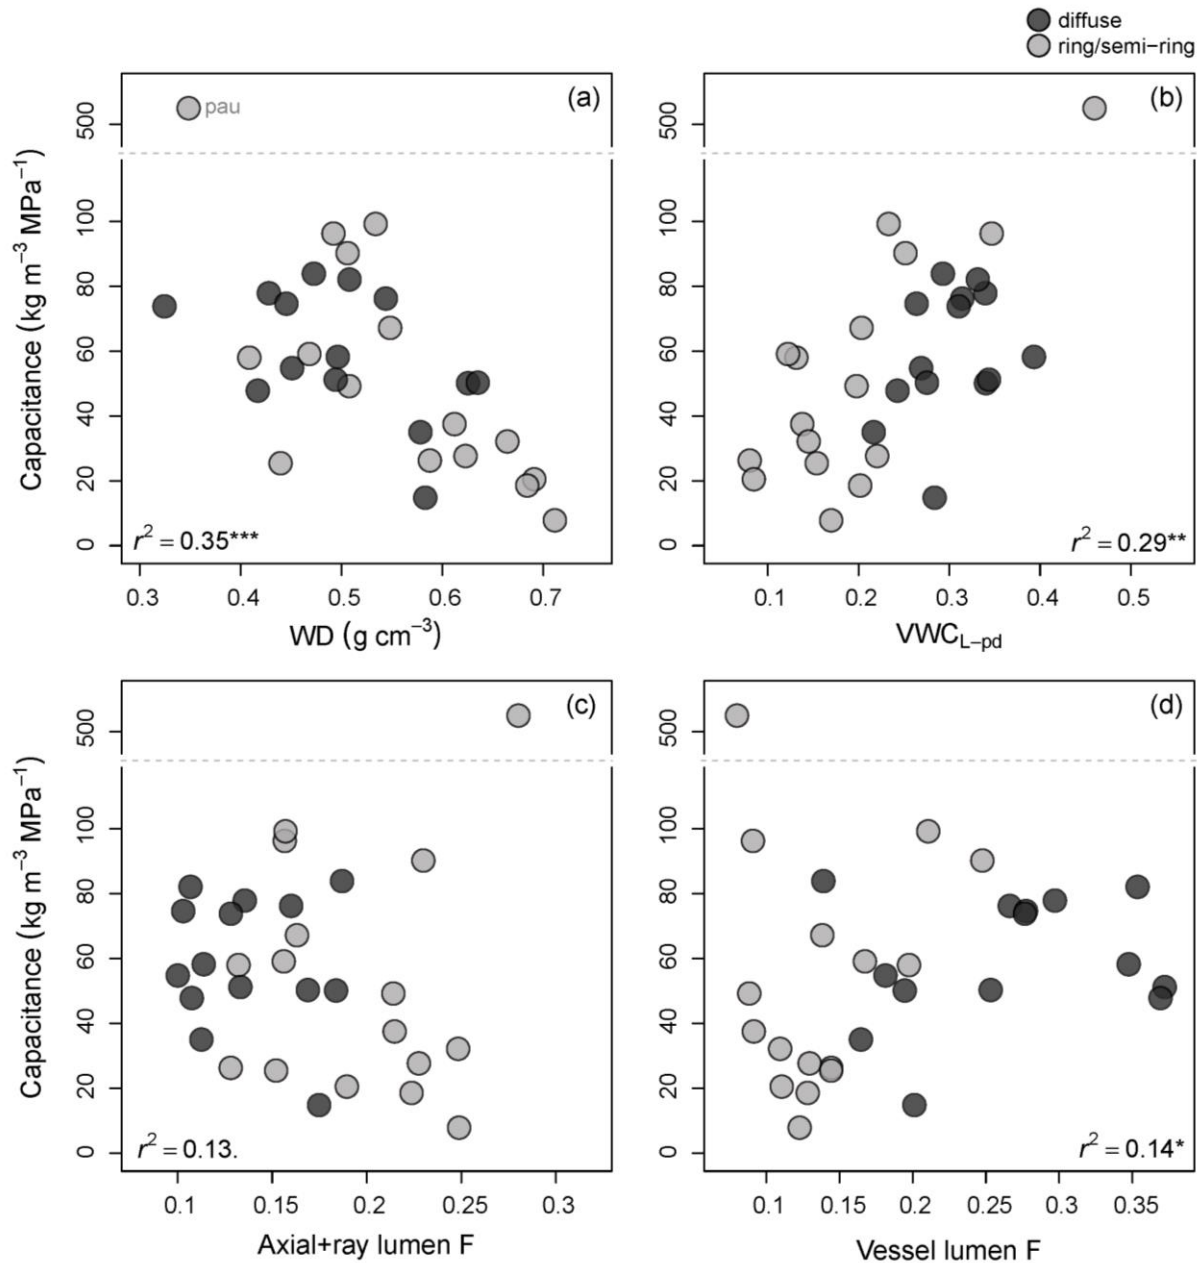

1020
